# Supplementary material for: Toxoplasma gondii Infection Inhibits Histone Crotonylation to Regulate Immune Response of Porcine Alveolar Macrophages
Source: Front Immunol. 2021 Jul 8;12:696061. doi: 10.3389/fimmu.2021.696061 (PMC8312545; doi:10.3389/fimmu.2021.696061)
Supplement: Supplementary Table 2 — Differentially expressed Kcr proteins identified in 3D4/21+RH and control cells. [file Table_2.xlsx]

## Sheet: Sheet1
Protein accession	Position	Amino acid	Regulated Type	Protein description	Gene name	Localization probability	PEP	Score	Modified sequence	Charge	Mass error [ppm]	MS/MS Count	3D4_21_RH_1	3D4_21_RH_2	Blank_1	Blank_2	3D4/21+RH_1/Control_1 Ratio	3D4/21+RH_2/Control_2 Ratio
A0A286ZIH0	402	K	Up	Hypoxia up-regulated 1	HYOU1	1	0.00192	96.113	AVGK(1)EELGK	2	0.1192	1	1.26	1.155	0.735	0.886	1.703	1.281
A0A286ZIH0	973	K	Up	Hypoxia up-regulated 1	HYOU1	1	0.0172	80.755	EQPTEQK(1)R	2	-0.70068	1	1.427	1.163	0.884	0.642	1.606	1.779
A0A286ZIH3	44	K	Up	Elongation factor 1-alpha	LOC100620900	1	0.00194	84.507	FEK(1)EASEMGK	2	1.6407	3	1.796	1.811	0.15	0.297	11.963	5.993
A0A286ZIN0	114	K	Down	Heterogeneous nuclear ribonucleoprotein D	HNRNPD	1	0.00553	91.549	DLK(1)DYFSK	2	-0.8734	1	0.84	0.71	1.291	1.2	0.646	0.581
A0A286ZIN0	153	K	Down	Heterogeneous nuclear ribonucleoprotein D	HNRNPD	1	0.000312	83.137	ESESVDK(1)VMDQK	3	-4.3806	2	0.871	0.935	1.044	1.144	0.829	0.804
A0A286ZIN0	243	K	Down	Heterogeneous nuclear ribonucleoprotein D	HNRNPD	1	0.000569	99.973	K(1)YHNVGLSK	3	4.0838	3	0.968	0.852	1.201	1.036	0.801	0.808
A0A286ZJK2	48	K	Down	Heterogeneous nuclear ribonucleoprotein M	HNRNPM	1	0.001	111.94	GEGERPAQNEK(1)R	3	0.37882	2	0.968	0.7	1.346	1.076	0.714	0.64
A0A286ZJK2	88	K	Down	Heterogeneous nuclear ribonucleoprotein M	HNRNPM	1	0.0151	69.815	WQSLK(1)DLVK	2	-1.7233	1	0.792	0.814	1.266	1.148	0.621	0.697
A0A286ZJK2	126	K	Down	Heterogeneous nuclear ribonucleoprotein M	HNRNPM	1	0.00573	117.4	MEESMK(1)K	2	-0.42372	1	0.67	0.664	1.405	1.279	0.474	0.511
A0A286ZJK2	134	K	Down	Heterogeneous nuclear ribonucleoprotein M	HNRNPM	1	0.000591	69.201	AAEVLNK(1)HSLSGR	3	0.5191	1	0.63	0.954	1.112	1.242	0.563	0.755
A0A286ZJK2	145	K	Down	Heterogeneous nuclear ribonucleoprotein M	HNRNPM	1	2.62e-25	190.46	VK(1)EDPDGEHAR	3	0.09102	4	1.006	0.688	1.359	1.051	0.736	0.643
A0A286ZJK2	200	K	Down	Heterogeneous nuclear ribonucleoprotein M	HNRNPM	1	0.000857	117.86	ADILEDK(1)DGK	2	-0.45636	6	0.81	0.838	1.245	1.127	0.646	0.732
A0A286ZJK2	238	K	Up	Heterogeneous nuclear ribonucleoprotein M	HNRNPM	1	0.00177	83.862	PMHVK(1)MDER	3	-0.82646	1	1.226	1.137	0.911	0.79	1.337	1.417
A0A286ZJK2	659	K	Down	Heterogeneous nuclear ribonucleoprotein M	HNRNPM	1	4.56e-07	115.8	GCGVVK(1)FESPEVAER	2	0.11662	1	0.554	0.819	1.228	1.343	0.448	0.601
A0A286ZKG9	89	K	Down	Peptidyl-prolyl cis-trans isomerase	PPIB	1	0.0171	74.376	GFGYK(1)NSK	2	0.51469	1	0.802	0.91	0.995	1.257	0.801	0.712
A0A286ZKG9	165	K	Down	Peptidyl-prolyl cis-trans isomerase	PPIB	1	2.69e-06	102.73	TAWLDGK(1)HVVFGK	3	0.7728	1	0.777	0.596	1.452	1.236	0.531	0.475
A0A286ZL51	33	K	Up	Uncharacterized protein	RPL23A	1	0.000302	124.59	GVHSHK(1)K	3	-0.36517	1	1.453	1.026	0.976	0.691	1.479	1.461
A0A286ZL51	85	K	Down	Uncharacterized protein	RPL23A	1	0.000199	136.02	FPLTTESAMK(1)K	2	0.59111	2	0.803	0.865	1.185	1.152	0.674	0.739
A0A286ZLH8	95	K	Up	Uncharacterized protein	RPL35A	1	0.00034	92.112	SNLPAK(1)AIGHR	3	-0.69819	1	1.265	1.045	0.965	0.813	1.302	1.264
A0A286ZLW6	568	K	Down	Scaffold attachment factor B	SAFB	1	0.0243	67.704	TVVMDK(1)SK	2	0.66998	1	0.725	0.897	1.113	1.232	0.647	0.715
A0A286ZN81	767	K	Up	Nuclear mitotic apparatus protein 1	NUMA1	1	1.26e-05	82.709	LQQLGEAHQAK(1)TEALR	3	2.9156	1	1.071	1.16	0.833	0.938	1.277	1.216
A0A286ZN81	1472	K	Down	Nuclear mitotic apparatus protein 1	NUMA1	1	0.000212	79.875	EK(1)YGQELAAVR	2	-0.40418	2	0.565	0.918	1.125	1.316	0.499	0.686
A0A286ZN81	1605	K	Down	Nuclear mitotic apparatus protein 1	NUMA1	1	0.00224	57.288	EQAAEHYK(1)LQMEK	3	0.64919	1	0.546	0.976	1.071	1.313	0.507	0.73
A0A286ZN81	1661	K	Down	Nuclear mitotic apparatus protein 1	NUMA1	1	0.000264	138.76	TK(1)EAEQTCR	2	-0.47296	2	0.963	0.738	1.266	1.105	0.756	0.657
A0A286ZN96	65	K	Down	Uncharacterized protein	---	1	0.0068	88.495	GTFADK(1)EK	2	-0.64992	2	0.849	0.891	1.2	1.082	0.703	0.809
A0A286ZPY1	128	K	Up	AHNAK nucleoprotein	AHNAK	1	0.0053	83.862	FK(1)MPEMNIK	2	0.40507	1	1.301	1.524	0.562	0.617	2.303	2.427
A0A286ZPY1	1058	K	Up	AHNAK nucleoprotein	AHNAK	1	0.000468	70.889	VEGDLK(1)GPEVDLK	3	-0.94808	1	1.309	1.215	0.768	0.765	1.693	1.562
A0A286ZQI6	132	K	Down	Uncharacterized protein	---	1	0.000764	94.114	VLLEK(1)YK	2	0.79566	2	0.915	0.805	1.227	1.102	0.74	0.718
A0A286ZR85	166	K	Down	Spectrin alpha, non-erythrocytic 1	SPTAN1	1	1.49e-05	90.725	EK(1)EQLMASDDFGR	2	1.3584	1	0.688	0.951	1.091	1.22	0.627	0.767
A0A286ZR85	400	K	Down	Spectrin alpha, non-erythrocytic 1	SPTAN1	1	0.00147	117.81	K(1)HEDFEK	3	0.54784	1	0.771	0.643	1.436	1.203	0.533	0.525
A0A286ZR85	756	K	Up	Spectrin alpha, non-erythrocytic 1	SPTAN1	1	0.00191	96.229	AK(1)LSELNQK	2	-0.094845	2	1.075	1.148	0.881	0.91	1.211	1.24
A0A286ZR85	1190	K	Down	Spectrin alpha, non-erythrocytic 1	SPTAN1	1	0.0176	43.761	AK(1)LGDSHDLQR	3	0.059816	1	0.745	0.898	1.086	1.238	0.681	0.715
A0A286ZR85	1275	K	Down	Spectrin alpha, non-erythrocytic 1	SPTAN1	1	0.00161	96.059	EK(1)LDILEQER	2	1.3861	1	0.793	0.767	1.286	1.181	0.613	0.639
A0A286ZR85	1342	K	Down	Spectrin alpha, non-erythrocytic 1	SPTAN1	1	0.0266	51.193	K(1)HEDFDK	3	1.9665	1	0.807	0.878	1.143	1.171	0.702	0.737
A0A286ZR85	1903	K	Up	Spectrin alpha, non-erythrocytic 1	SPTAN1	1	0.00215	62.287	DQLLAAK(1)HVQSK	3	-0.0032728	1	0.915	1.414	0.553	1.012	1.645	1.373
A0A286ZRB3	24	K	Down	Uncharacterized protein	---	1	2.12e-76	191.16	QLATK(1)AAR	2	-1.5133	2	0.431	0.38	1.709	1.5	0.251	0.249
A0A286ZRB3	57	K	Down	Uncharacterized protein	---	1	8.05e-10	166.29	YQK(1)STELLIR	2	-0.05243	5	0.518	0.71	1.387	1.355	0.37	0.515
A0A286ZRB3	74	K	Down	Uncharacterized protein	---	1	5.64e-58	225.33	EIAQDFK(1)TDLR	2	-0.82041	9	0.591	0.546	1.54	1.349	0.381	0.398
A0A286ZRB3	117	K	Down	Uncharacterized protein	---	1	4.51e-33	203.88	VTIMPK(1)DIQLAR	2	0.7424	27	0.618	0.62	1.498	1.287	0.41	0.474
A0A286ZRL8	93	K	Down	NOP58 ribonucleoprotein	NOP58	1	1.17e-08	95.197	EAHEPLAVADAK(1)LGGVIK	3	0.058019	2	0.722	0.852	1.126	1.27	0.637	0.66
A0A286ZRL8	418	K	Down	NOP58 ribonucleoprotein	NOP58	1	0.00467	95.502	AEK(1)YEHK	3	1.8266	1	0.824	0.832	1.19	1.168	0.689	0.7
A0A286ZRU9	332	K	Up	Serpin H1 precursor	SERPINH1	1	3.42e-09	141.13	HLAGLGLTEAIDK(1)NK	3	0.73528	1	1.208	1.246	0.761	0.809	1.576	1.515
A0A286ZS07	1446	K	Down	Spectrin beta chain	SPTBN1	1	0.000663	133.75	STDEVDSK(1)R	2	0.45363	2	0.881	0.89	1.149	1.101	0.761	0.795
A0A286ZS07	1968	K	Up	Spectrin beta chain	SPTBN1	1	0.000848	93.096	K(1)HYASEEIK	3	-0.52361	1	1.232	1.039	0.964	0.844	1.271	1.21
A0A286ZS83	30	K	Down	Heterogeneous nuclear ribonucleoproteins C1/C2 isoform 2	HNRNPC	1	0.000929	112.44	K(1)SDVEAIFSK	3	-0.20424	4	0.825	0.718	1.331	1.173	0.617	0.602
A0A286ZS83	144	K	Down	Heterogeneous nuclear ribonucleoproteins C1/C2 isoform 2	HNRNPC	1	3.12e-05	134.06	AVVPSK(1)R	2	0.28179	2	0.823	0.739	1.355	1.133	0.604	0.641
A0A286ZS83	177	K	Down	Heterogeneous nuclear ribonucleoproteins C1/C2 isoform 2	HNRNPC	1	0.000668	122.33	LK(1)GDDLQAIK	2	0.1176	5	0.913	0.854	1.181	1.087	0.769	0.772
A0A286ZS83	186	K	Down	Heterogeneous nuclear ribonucleoproteins C1/C2 isoform 2	HNRNPC	1	0.0161	107.57	K(1)ELTQIK	2	1.0437	2	0.979	0.819	1.181	1.076	0.824	0.749
A0A286ZS83	207	K	Down	Heterogeneous nuclear ribonucleoproteins C1/C2 isoform 2	HNRNPC	1	0.0145	93.649	IEK(1)EQSK	2	1.0008	2	0.866	0.763	1.287	1.132	0.668	0.662
A0A286ZS83	220	K	Down	Heterogeneous nuclear ribonucleoproteins C1/C2 isoform 2	HNRNPC	1	1.05e-22	181.08	NDK(1)SEEEQSSSSQK	3	-0.065042	3	0.946	0.844	1.266	1.009	0.743	0.823
A0A286ZS83	232	K	Down	Heterogeneous nuclear ribonucleoproteins C1/C2 isoform 2	HNRNPC	1	0.0194	95.358	K(1)DETNVK	2	-0.20858	3	0.948	0.82	1.23	1.06	0.766	0.761
A0A286ZSB5	15	K	Up	Transitional endoplasmic reticulum ATPase	VCP	1	0.00189	96.342	GDTVLLK(1)GK	2	-0.028972	2	0.92	1.462	0.579	0.937	1.579	1.535
A0A286ZSD7	145	K	Down	Stomatin like 2	STOML2	1	0.0186	72.325	LSLDK(1)VFR	2	-1.043	1	0.793	0.892	1.142	1.166	0.69	0.752
A0A286ZSW6	90	K	Up	Calnexin precursor	CANX	0.864861	0.00267	85.837	AK(0.865)K(0.135)DDTDDEIAK	3	-0.43042	2	1.299	1.03	0.978	0.794	1.32	1.275
A0A286ZSW6	119	K	Up	Calnexin precursor	CANX	1	0.00839	60.555	LPGDK(1)GLVLLSR	2	0.086431	2	1.356	1.118	0.838	0.774	1.608	1.422
A0A286ZSW6	171	K	Up	Calnexin precursor	CANX	1	3.98e-05	79.837	LLSK(1)TPELNLDQFHDK	3	-1.6548	1	0.951	1.337	0.644	0.993	1.469	1.324
A0A286ZSW6	218	K	Up	Calnexin precursor	CANX	1	0.0115	55.314	TGVYEEK(1)HAK	3	1.3353	1	1.329	1.015	0.996	0.774	1.324	1.29
A0A286ZSW6	234	K	Down	Calnexin precursor	CANX	1	0.00042	128.61	TYFTDK(1)K	2	1.4247	1	0.864	0.8	1.248	1.125	0.687	0.7
A0A286ZTL8	87	K	Down	Lamin B2	LMNB2	1	0.00663	78.705	ISEK(1)EEVTTR	2	-1.2017	1	0.638	1.011	1.026	1.246	0.618	0.797
A0A286ZUI3	41	K	Up	Elongation factor 1-alpha 1	EEF1A1	1	0.00868	106.42	TIEK(1)FEK	2	0.9076	3	1.602	1.289	0.651	0.572	2.444	2.214
A0A286ZUI3	150	K	Down	Elongation factor 1-alpha 1	EEF1A1	1	0.0062	94.85	EVSTYIK(1)K	2	-0.84081	1	0.624	1.081	0.835	1.334	0.743	0.797
A0A286ZUI3	410	K	Up	Elongation factor 1-alpha 1	EEF1A1	1	4.65e-05	130.29	QTVAVGVIK(1)AVDK	3	0.37762	2	1.472	1.023	0.82	0.803	1.784	1.253
A0A286ZUI3	421	K	Up	Elongation factor 1-alpha 1	EEF1A1	1	0.000271	115.78	AAGAGK(1)VTK	2	0.44401	3	1.33	1.017	0.947	0.808	1.395	1.237
A0A286ZUI3	424	K	Up	Elongation factor 1-alpha 1	EEF1A1	1	0.00934	110.41	VTK(1)SAQK	2	-0.51785	2	1.335	1.121	0.877	0.755	1.512	1.459
A0A286ZV95	127	K	Down	Transmembrane p24 trafficking protein 10	TMED10	1	2.4e-12	140.2	IPDQLVILDMK(1)HGVEAK	3	-0.13265	2	0.835	0.942	1.076	1.137	0.771	0.814
A0A286ZVE3	24	K	Down	Pinin	PNN	1	0.00152	124.07	FK(1)QESTVATER	2	0.6563	1	0.769	0.735	1.357	1.175	0.564	0.615
A0A286ZVW9	23	K	Up	Calponin	CNN1	1	0.0258	72.325	LQPGSVK(1)K	2	-0.57561	1	1.308	1.183	0.719	0.836	1.807	1.394
A0A286ZW34	185	K	Down	Uncharacterized protein	MATR3	1	0.000679	110.12	VHLSQK(1)YK	3	-0.69195	1	0.808	0.746	1.349	1.141	0.595	0.643
A0A286ZW34	203	K	Down	Uncharacterized protein	MATR3	1	0.000577	127.83	FDQK(1)QELGR	2	0.7256	3	0.733	0.931	1.116	1.19	0.654	0.769
A0A286ZW34	337	K	Down	Uncharacterized protein	MATR3	1	3.19e-10	158.42	TESTTEGK(1)EQEEK	3	-0.63605	3	0.763	0.881	1.227	1.132	0.618	0.765
A0A286ZYE6	280	K	Down	Isocitrate dehydrogenase [NADP]	IDH2	1	0.024	78.516	TDFDK(1)YK	2	2.163	1	0.947	0.81	1.226	1.074	0.767	0.742
A0A286ZYE7	162	K	Down	Heterogeneous nuclear ribonucleoprotein D like	HNRNPDL	1	0.0243	67.999	K(1)DLTEYLSR	2	0.60568	1	0.653	0.838	1.211	1.267	0.536	0.651
A0A286ZYE7	209	K	Down	Heterogeneous nuclear ribonucleoprotein D like	HNRNPDL	1	0.000711	109.66	VLELK(1)EHK	3	0.22374	3	0.851	0.845	1.225	1.108	0.691	0.75
A0A286ZYE7	302	K	Down	Heterogeneous nuclear ribonucleoprotein D like	HNRNPDL	1	2.6e-09	160.18	YHQIGSGK(1)CEIK	3	-0.0065922	2	0.809	0.965	0.976	1.21	0.824	0.784
A0A286ZYE7	311	K	Down	Heterogeneous nuclear ribonucleoprotein D like	HNRNPDL	1	0.00273	89.317	VAQPK(1)EVYR	2	-0.22465	1	0.603	0.648	1.454	1.304	0.412	0.488
A0A286ZYM6	162	K	Down	ATP synthase peripheral stalk-membrane subunit b	ATP5PB	1	0.0014	106.62	SQQALVQK(1)R	2	2.2684	3	0.839	0.833	1.259	1.102	0.662	0.743
A0A286ZYM6	233	K	Down	ATP synthase peripheral stalk-membrane subunit b	ATP5PB	1	1.81e-14	149.97	HVVQSISAQQEK(1)ETIAK	3	0.74891	1	0.74	0.857	1.17	1.218	0.629	0.691
A0A286ZYT0	149	K	Up	RALY heterogeneous nuclear ribonucleoprotein	RALY	1	0.000668	111.27	TTIPVK(1)LFAR	2	1.4333	1	1.198	1.127	0.806	0.903	1.475	1.228
A0A286ZYX8	13	K	Up	Fructose-bisphosphate aldolase	ALDOA	1	0.000139	78.964	PHQYPALTPEQK(1)K	3	-0.28489	3	1.358	1.383	0.636	0.662	2.12	2.056
A0A286ZYX8	14	K	Up	Fructose-bisphosphate aldolase	ALDOA	1	0.000108	138.22	K(1)ELSDIAHR	3	1.2863	2	1.255	1.231	0.785	0.774	1.589	1.565
A0A286ZYX8	42	K	Up	Fructose-bisphosphate aldolase	ALDOA	1	1.24e-30	192.46	GILAADESTGSIAK(1)R	3	1.7672	5	1.158	1.349	0.621	0.851	1.851	1.558
A0A286ZYX8	330	K	Up	Fructose-bisphosphate aldolase	ALDOA	1	9.72e-10	163.38	AAQEEYVK(1)R	2	-0.12958	2	1.376	1.281	0.682	0.716	2.005	1.757
A0A286ZYY8	267	K	Down	MYB binding protein 1a	MYBBP1A	1	0.0013	93.766	K(1)LPAVALDLLR	2	-0.9067	1	0.701	0.773	1.305	1.223	0.533	0.622
A0A286ZYY8	585	K	Down	MYB binding protein 1a	MYBBP1A	1	2.27e-06	101.43	TLK(1)ELETHSSEAK	3	-2.7868	1	0.764	0.71	1.393	1.174	0.545	0.595
A0A286ZYY8	988	K	Down	MYB binding protein 1a	MYBBP1A	1	1.47e-05	119.02	EK(1)TTAADASAQGR	2	-0.33871	3	0.808	0.783	1.084	1.311	0.74	0.587
A0A286ZZB7	46	K	Down	Histone cluster 1 H1 family member e	HIST1H1E	1	2.16e-08	92.633	ASGPPVSELITK(1)AVAASK	3	-0.38196	2	0.525	0.607	1.509	1.359	0.345	0.439
A0A286ZZB7	52	K	Down	Histone cluster 1 H1 family member e	HIST1H1E	1	1.76e-06	146.79	AVAASK(1)ER	2	-0.071888	1	0.525	0.407	1.711	1.404	0.304	0.284
A0A286ZZB7	63	K	Down	Histone cluster 1 H1 family member e	HIST1H1E	1	0.000549	98.048	SGVSLAALK(1)K	3	0.20024	4	0.423	0.52	1.632	1.422	0.257	0.36
A0A286ZZB7	75	K	Up		HIST1H1E	1	1.4e-09	98.654	ALAAAGYDVEK(1)NNSR	3	-0.9405	1	1.255	1.146	0.862	0.799	1.446	1.411
A0A286ZZB7	85	K	Down	Histone cluster 1 H1 family member e	HIST1H1E	1	0.00437	85.813	LGLK(1)SLVSK	2	-0.66892	1	0.699	0.607	1.483	1.255	0.468	0.476
A0A286ZZB7	90	K	Down	Histone cluster 1 H1 family member e	HIST1H1E	1	2.59e-05	140.82	SLVSK(1)GTLVQTK	2	0.93538	5	0.642	0.759	1.343	1.252	0.474	0.596
A0A287A044	45	K	Up	Aspartate aminotransferase	GOT2	1	0.00366	90.05	K(1)AEAQIAAK	3	-1.5494	3	1.067	1.148	0.874	0.922	1.214	1.223
A0A287A044	367	K	Down	Aspartate aminotransferase	GOT2	1	0.021	47.429	EFSIYMTK(1)DGR	2	-0.92931	1	0.781	0.868	1.158	1.187	0.669	0.719
A0A287A0V6	289	K	Up	Pyrroline-5-carboxylate reductase	PYCR1	1	0.024	78.516	TVLDK(1)VK	2	0.95065	1	1.391	1.195	0.718	0.765	1.924	1.535
A0A287A1E0	302	K	Up	Eukaryotic translation elongation factor 2	EEF2	1	0.00399	96.342	LIEK(1)LDIK	2	1.3378	2	1.231	1.017	1.009	0.832	1.212	1.201
A0A287A1E0	582	K	Up	Eukaryotic translation elongation factor 2	EEF2	1	0.00704	82.671	SPNK(1)HNR	3	-0.21864	1	1.92	1.349	0.527	0.382	3.618	3.462
A0A287A2J1	337	K	Down	Kinectin	KTN1	1	1.51e-10	143.93	GELTALVHQLQEK(1)DK	3	-0.86942	1	0.879	0.895	1.099	1.137	0.794	0.775
A0A287A2J1	352	K	Up	Kinectin	KTN1	1	0.0239	63.32	EDAAAMK(1)DR	2	-1.9024	1	1.155	1.081	0.928	0.885	1.238	1.201
A0A287A2J1	521	K	Down	Kinectin	KTN1	1	6.65e-21	158.45	TAEHEAAQQDLQSK(1)FVAK	3	0.041503	1	0.726	0.912	1.162	1.177	0.621	0.762
A0A287A2J1	612	K	Up	Kinectin	KTN1	1	0.0127	101.54	VIAEK(1)DK	2	-1.5077	2	1.179	1.183	0.859	0.818	1.364	1.422
A0A287A2J1	678	K	Down	Kinectin	KTN1	1	0.0227	48.794	SIHVK(1)DDK	3	0.15772	1	0.659	0.918	0.881	1.44	0.742	0.627
A0A287A2J1	886	K	Up	Kinectin	KTN1	1	0.00489	93.556	TVLEEK(1)EK	2	-0.21576	2	1.122	1.32	0.717	0.829	1.554	1.564
A0A287A2J1	1108	K	Up	Kinectin	KTN1	1	0.00521	92.538	VK(1)VDESQK	2	-2.1526	1	1.25	1.055	0.975	0.806	1.274	1.287
A0A287A2J1	1181	K	Down	Kinectin	KTN1	1	1.16e-18	179.93	K(1)LDDSYSEAVR	2	0.80614	2	0.859	0.931	1.081	1.127	0.79	0.811
A0A287A2N6	235	K	Up	MICOS complex subunit MIC60	IMMT	1	0.000531	120.99	SVIENAK(1)K	2	-1.407	5	1.247	1.205	0.8	0.792	1.548	1.496
A0A287A2N6	236	K	Up	MICOS complex subunit MIC60	IMMT	1	0.0141	83.869	K(1)EEVAGAK	2	0.64116	1	1.241	1.11	0.88	0.83	1.401	1.315
A0A287A2N6	349	K	Up	MICOS complex subunit MIC60	IMMT	1	0.00205	58.079	ATEK(1)QHIALALEK	3	-0.12313	2	1.477	1.355	0.549	0.674	2.671	1.975
A0A287A4A5	43	K	Up	Uncharacterized protein	LOC100157002	1	0.0157	73.951	K(1)LNEQSPTR	2	-0.82835	1	1.276	1.116	0.862	0.814	1.469	1.347
A0A287A4R1	62	K	Up	Actin, beta like 2	ACTBL2	1	0.0001	137.84	DCYVGDEAQSK(1)R	2	1.5665	2	1.989	1.607	0.212	0.317	9.36	4.983
A0A287A518	208	K	Up	Prohibitin	PHB	1	0.000204	91.812	K(1)AAIISAEGDSK	2	-1.2288	2	1.327	1.227	0.728	0.77	1.809	1.566
A0A287A5S4	133	K	Up	Ribosomal protein L19	RPL19	1	0.0105	77.124	K(1)LLADQAEAR	2	-0.0088101	1	0.843	1.326	0.678	1.054	1.234	1.237
A0A287A784	130	K	Down	Keratin, type II cytoskeletal 8	KRT8	1	2.11e-17	178.1	VLETK(1)WNLLQQQK	3	-1.1858	4	0.922	0.852	1.196	1.073	0.766	0.78
A0A287A784	205	K	Down	Keratin, type II cytoskeletal 8	KRT8	1	1.78e-11	168.61	TDMENEFVIIK(1)K	3	1.9546	7	1.01	0.781	1.238	1.048	0.811	0.732
A0A287A784	360	K	Down	Keratin, type II cytoskeletal 8	KRT8	1	4.21e-07	141.86	DAQAK(1)LAELEAALR	3	0.26778	2	0.911	0.791	1.238	1.109	0.732	0.7
A0A287A784	465	K	Up	Keratin, type II cytoskeletal 8	KRT8	1	0.000706	110.39	TSSK(1)AVVVK	3	-0.020754	5	1.289	1.11	0.881	0.796	1.455	1.369
A0A287A7F5	39	K	Down	60S ribosomal protein L31	RPL31	1	0.00205	91.626	IHGVGFK(1)K	3	1.0145	1	0.756	0.785	1.253	1.215	0.599	0.635
A0A287A7F5	70	K	Up	60S ribosomal protein L31	RPL31	1	0.00324	100.02	LNK(1)AVWAK	2	0.75911	2	1.064	1.191	0.793	0.943	1.332	1.241
A0A287A7F6	147	K	Down	Prohibitin-2	PHB2	1	4.66e-07	118.23	SVVAK(1)FNASQLITQR	2	1.0885	1	0.805	0.856	1.083	1.239	0.739	0.679
A0A287A7G8	6	K	Down	Histone H2B	---	1	3.92e-07	156.36	PEPAK(1)SAPAPK	2	1.7532	3	1.093	0.745	1.375	0.92	0.791	0.797
A0A287A7G8	12	K	Down	Histone H2B	---	1	0.00981	101.64	SAPAPK(1)K	3	-0.15907	11	0.944	0.711	1.378	1.058	0.681	0.661
A0A287A7G8	35	K	Down	Histone H2B	---	1	2.28e-14	178.71	K(1)ESYSVYVYK	3	1.4934	6	0.923	0.734	1.332	1.085	0.689	0.665
A0A287A7G8	58	K	Down	Histone H2B	---	1	2.03e-05	151.26	K(1)ESYSIYVYK	3	1.545	4	0.809	0.646	1.475	1.143	0.545	0.556
A0A287A7G8	109	K	Down	Histone H2B	---	1	2.92e-23	181.15	LAHYNK(1)R	3	-0.48885	13	0.85	0.659	1.431	1.136	0.59	0.571
A0A287A7G8	140	K	Down	Histone H2B	---	1	2.28e-20	181.66	HAVSEGTK(1)AVTK	2	-0.47295	9	1	0.807	1.218	1.045	0.816	0.759
A0A287A7G8	144	K	Down	Histone H2B	---	1	0.000574	128.01	AVTK(1)YTSAK	2	0.6134	3	0.798	0.77	1.251	1.201	0.633	0.631
A0A287A8T0	55	K	Up	60S ribosomal protein L7	RPL7	1	0.0222	81.296	LIYEK(1)AK	2	-0.242	1	1.113	1.223	0.77	0.894	1.436	1.345
A0A287A9S3	68	K	Down	Tumor protein D52	TPD52	1	0.000114	128.57	HLAEIK(1)R	3	-0.2955	1	1.06	0.69	1.315	1.045	0.802	0.649
A0A287A9T4	347	K	Down	Heat shock protein HSP 90-beta	HSP90AB1	1	0.0254	76.326	RAPFDLFENK(1)K	3	-0.14542	1	0.733	0.914	1.084	1.231	0.673	0.73
A0A287A9T4	428	K	Down	Heat shock protein HSP 90-beta	HSP90AB1	1	0.00697	93.096	K(1)FYEAFSK	2	3.5136	1	0.897	0.917	1.122	1.082	0.794	0.833
A0A287A9T4	551	K	Down	Heat shock protein HSP 90-beta	HSP90AB1	0.852631	1.59e-05	107.74	EGLELPEDEEEK(0.147)K(0.853)K	3	0.31381	1	0.824	0.905	1.198	1.087	0.683	0.817
A0A287A9T4	607	K	Up	Heat shock protein HSP 90-beta	HSP90AB1	1	0.0155	76.478	IMK(1)AQALR	2	0.76536	2	1.512	1.22	0.816	0.576	1.84	2.081
A0A287A9T4	624	K	Down	Heat shock protein HSP 90-beta	HSP90AB1	1	4.13e-12	141.13	K(1)HLEINPDHPIVETLR	3	0.51525	2	0.617	1.064	0.954	1.265	0.642	0.826
A0A287A9T4	649	K	Down	Heat shock protein HSP 90-beta	HSP90AB1	0.990436	0.0214	78.324	AEADK(0.01)NDK(0.99)AVK	3	0.096552	1	0.973	0.718	1.242	1.137	0.778	0.621
A0A287AA21	261	K	Down	Enoyl-CoA hydratase, mitochondrial	ECHS1	1	0.021	54.951	K(1)LFYSTFATEDR	2	0.29684	1	0.648	0.948	1.124	1.227	0.573	0.76
A0A287AAR4	326	K	Up	Actin, cytoplasmic 1	ACTB	1	2.74e-06	133.32	EITALAPSTMK(1)IK	3	-0.093658	5	1.098	1.176	0.779	0.945	1.4	1.223
A0A287ACN9	113	K	Down	Fibrillarin	FBL	1	9.93e-05	127.36	NLVPGESVYGEK(1)R	3	-1.5314	3	0.625	1.037	0.94	1.296	0.66	0.786
A0A287ACN9	197	K	Down	Fibrillarin	FBL	1	0.00408	103.55	DLINLAK(1)K	2	-0.13862	3	0.932	0.868	1.138	1.094	0.814	0.779
A0A287AD16	264	K	Up	L-lactate dehydrogenase	LDHA	1	2.83e-05	117.93	VTLTPEEEAHLK(1)K	3	0.37798	2	1.248	1.279	0.717	0.782	1.729	1.609
A0A287AD92	64	K	Up	GrpE protein homolog	GRPEL1	1	0.00325	99.815	TLMEEK(1)VK	2	0.30015	1	1.061	1.209	0.775	0.941	1.361	1.263
A0A287AE76	359	K	Up	60S ribosomal protein L4	RPL4	1	0.0251	67.169	AAAALK(1)AK	2	-2.7373	1	1.132	1.179	0.906	0.818	1.241	1.417
A0A287AEG8	94	K	Up	60S ribosomal protein L10	RPL10	1	0.000151	112.42	LQNK(1)EHVIEALR	3	0.87255	2	1.16	1.286	0.758	0.806	1.522	1.57
A0A287AG18	1794	K	Down	SON DNA binding protein	SON	0.999505	0.0124	98.933	SKK(1)NK(1)NR	3	0.76825	1	0.881	0.692	1.334	1.157	0.656	0.588
A0A287AG18	1796	K	Down	SON DNA binding protein	SON	0.999999	0.0124	98.933	SKK(1)NK(1)NR	3	0.76825	1	0.881	0.692	1.334	1.157	0.656	0.588
A0A287AH85	64	K	Up	Adenylate kinase 2, mitochondrial	AK2	1	0.000966	118.76	AMVASGSELGK(1)K	2	0.30691	1	1.088	1.232	0.766	0.905	1.413	1.338
A0A287AJ96	830	K	Up	Catenin alpha 1	CTNNA1	1	0.00923	55.261	NTSDVISAAK(1)K	3	-0.049364	2	1.091	1.225	0.789	0.892	1.375	1.351
A0A287AKA2	33	K	Down	Aminoacyl tRNA synthase complex-interacting multifunctional protein 1	AIMP1	1	0.0113	58.699	QQVAILK(1)EK	3	0.1465	1	0.551	1.152	0.722	1.404	0.759	0.808
A0A287AKF5	163	K	Down	T-complex protein 1 subunit eta	CCT7	1	0.000288	138.25	AEK(1)DNAEIR	2	-0.59945	2	0.792	0.731	1.357	1.162	0.581	0.618
A0A287AKW4	171	K	Up	Transmembrane glycoprotein NMB precursor	GPNMB	1	0.000238	128.27	TYVPIAK(1)VK	3	0.35565	7	1.353	1.137	0.808	0.781	1.664	1.431
A0A287AKY6	697	K	Down	Uncharacterized protein	RAD50	1	0.000891	115.49	NK(1)LQNVNR	2	-0.98613	2	0.876	0.944	1.067	1.114	0.816	0.833
A0A287ALC2	1328	K	Down	Uncharacterized protein	LOC100511376	1	0.000543	102.87	FK(1)TPEEAALFK	2	1.9888	1	0.607	0.776	1.248	1.333	0.483	0.573
A0A287ALI7	38	K	Down	Core histone macro-H2A	H2AFY	0.999995	0.0114	68.485	KGHPK(1)YR	4	1.597	1	0.782	0.748	1.304	1.192	0.596	0.617
A0A287ARA0	6	K	Down	Uncharacterized protein	LOC110261671	1	0.000543	102.87	PDPAK(1)SAPAPK	3	1.5962	3	0.802	0.906	1.073	1.2	0.743	0.743
A0A287ARA0	12	K	Down	Uncharacterized protein	LOC110261671	1	0.00981	101.64	SAPAPK(1)K	3	-0.15907	11	0.944	0.711	1.378	1.058	0.681	0.661
A0A287ARU7	73	K	Up	Tyrosine 3-monooxygenase/tryptophan 5-monooxygenase activation protein epsilon	YWHAE	1	0.01	75.819	EENK(1)GGEDK	2	-0.29555	1	1.292	1.146	0.869	0.767	1.478	1.47
A0A287ASI0	202	K	Down	Keratin 7	KRT7	1	0.00204	98.105	K(1)DVDIAYMNK	2	0.16576	1	0.551	0.87	1.172	1.337	0.468	0.639
A0A287ATW3	98	K	Down	Glutamate dehydrogenase	GLUD1	1	0.0174	102.51	ESEEQK(1)R	2	0.88719	1	0.757	0.739	1.286	1.235	0.585	0.588
A0A287AWZ0	139	K	Down	KH domain-containing, RNA-binding, signal transduction-associated protein 1	KHDRBS1	1	2.82e-08	103.88	K(1)DDEENYLDLFSHK	3	-2.6444	2	0.735	0.792	1.299	1.186	0.562	0.657
A0A287AWZ0	152	K	Down	KH domain-containing, RNA-binding, signal transduction-associated protein 1	KHDRBS1	1	1.22e-08	96.143	KDDEENYLDLFSHK(1)NMK	4	-0.98633	1	0.681	0.61	1.415	1.318	0.479	0.456
A0A287AXR5	9	K	Up	14-3-3 protein zeta/delta	YWHAZ	1	0.00911	85.29	NELVQK(1)AK	2	-0.60736	2	1.339	1.109	0.845	0.79	1.574	1.38
A0A287AXR5	11	K	Up	14-3-3 protein zeta/delta	YWHAZ	1	4.24e-07	155.53	AK(1)LAEQAER	2	1.8137	5	1.355	1.116	0.865	0.757	1.558	1.449
A0A287AXR5	74	K	Up	14-3-3 protein zeta/delta	YWHAZ	1	0.0165	107.01	TEGAEK(1)K	2	0.25	2	1.293	1.004	0.991	0.814	1.297	1.213
A0A287AXR5	120	K	Down	14-3-3 protein zeta/delta	YWHAZ	1	0.00918	110.61	VFYLK(1)MK	2	0.041165	4	1.005	0.849	1.21	1.004	0.825	0.831
A0A287AXR5	158	K	Up	14-3-3 protein zeta/delta	YWHAZ	1	0.000304	117.52	K(1)EMQPTHPIR	3	0.69823	4	1.193	1.098	0.964	0.813	1.229	1.329
A0A287AXS7	163	K	Up	ADP/ATP translocase 3	SLC25A6	1	0.00143	122.39	GLGDCLVK(1)ITK	2	-0.71741	1	1.257	1.056	0.894	0.864	1.398	1.201
A0A287AXS7	245	K	Down	ADP/ATP translocase 3	SLC25A6	1	0.00942	88.495	K(1)GADIMYK	2	0.76742	1	0.936	0.765	1.297	1.071	0.717	0.702
A0A287AXS7	263	K	Up	ADP/ATP translocase 3	SLC25A6	1	0.00795	86.898	IFK(1)DEGGK	2	0.74485	4	1.116	1.149	0.911	0.856	1.217	1.319
A0A287AXS7	272	K	Down	ADP/ATP translocase 3	SLC25A6	1	0.00015	91.62	AFFK(1)GAWSNVLR	2	-0.44311	1	0.902	0.823	1.208	1.107	0.743	0.73
A0A287AY54	11	K	Up	60S acidic ribosomal protein P0	RPLP0	1	0.00062	111.46	GK(1)AVVLMGK	2	-0.80088	1	1.51	1.196	0.688	0.703	2.182	1.674
A0A287AY75	89	K	Up	Golgi membrane protein 1	GOLM1	1	0.0245	86.833	GAVEMK(1)K	2	0.89547	1	1.294	1.174	0.849	0.752	1.515	1.536
A0A287AYN6	1187	K	Down	Uncharacterized protein	ZMYM3	1	0.0193	95.793	DTGPGK(1)R	2	0.40528	1	0.603	0.513	1.569	1.351	0.382	0.373
A0A287AZA7	33	K	Up	Ribosomal protein S27a	RPS27A	1	2.1e-07	127.03	IQDK(1)EGIPPDQQR	2	-0.60402	21	0.958	1.311	0.741	0.937	1.285	1.375
A0A287B094	308	K	Up	L-lactate dehydrogenase	LDHB	1	0.00615	79.492	LK(1)DDEVAQLK	2	-0.38006	1	1.176	1.291	0.709	0.827	1.646	1.535
A0A287B0L6	37	K	Down	Histone H2A	LOC110261668	1	0.00168	123.72	K(1)GNYAER	2	0.39019	2	0.853	0.669	1.443	1.114	0.586	0.591
A0A287B0L6	96	K	Down	Histone H2A	LOC110261668	1	7.48e-25	190.78	NDEELNK(1)LLGK	2	-3.3247	8	0.851	0.693	1.355	1.159	0.623	0.588
A0A287B0L6	120	K	Down	Histone H2A	LOC110261668	1	0.0194	95.502	K(1)TESHHK	2	-0.14748	1	0.813	0.65	1.468	1.142	0.55	0.56
A0A287B0L6	126	K	Down	Histone H2A	LOC110261668	0.999992	0.00411	73.499	KTESHHK(1)AK	4	-1.632	1	0.928	0.697	1.458	1.02	0.633	0.672
A0A287B356	27	K	Up	Eukaryotic translation initiation factor 5A	EIF5A	1	0.0152	99.139	K(1)NGFVVLK	2	-0.10218	1	1.217	1.222	0.761	0.828	1.589	1.452
A0A287B3U6	137	K	Down	Uncharacterized protein	---	1	0.0138	78.816	VFSGK(1)SER	2	0.36443	1	0.63	0.628	1.485	1.28	0.422	0.483
A0A287B410	995	K	Up	Oxoglutarate dehydrogenase	OGDH	1	3.55e-05	104.3	DPAAAPATGNK(1)K	3	1.9888	1	1.096	1.167	0.849	0.9	1.283	1.275
A0A287B4I0	85	K	Down	ATP synthase subunit d, mitochondrial	ATP5PD	1	8.61e-19	114.63	VPVPEDK(1)YTALVDAEEQEDVKR	3	0.4573	1	0.696	0.838	1.353	1.124	0.512	0.733
A0A287B4I0	117	K	Down	ATP synthase subunit d, mitochondrial	ATP5PD	1	0.000974	118.87	IEAYEK(1)ELEK	2	0.55678	1	0.758	0.941	1.093	1.179	0.69	0.785
A0A287B4K6	149	K	Up	40S ribosomal protein S3a	RPS3A	1	0.000376	72.891	EVQTNDLK(1)EVVNK	3	-0.28536	1	1.075	1.46	0.651	0.773	1.641	1.857
A0A287B4K6	154	K	Down	40S ribosomal protein S3a	RPS3A	1	8.68e-05	79.875	EVVNK(1)LIPDSIGK	3	2.2183	1	0.87	0.774	1.171	1.208	0.738	0.63
A0A287B4K6	216	K	Down	40S ribosomal protein S3a	RPS3A	1	0.014	55.899	ATGDETGAK(1)VER	2	-0.68112	1	0.812	0.929	1.121	1.131	0.72	0.808
A0A287B574	37	K	Down	Succinate--CoA ligase [ADP/GDP-forming] subunit alpha, mitochondrial	SUCLG1	1	0.0159	61.962	K(1)HLYVDK	3	1.3216	1	0.866	0.732	1.294	1.157	0.666	0.622
A0A287B574	94	K	Down	Succinate--CoA ligase [ADP/GDP-forming] subunit alpha, mitochondrial	SUCLG1	1	2.96e-06	87.519	THLGLPVFNTVK(1)EAK	3	1.3904	2	0.762	0.881	1.119	1.217	0.677	0.711
A0A287B5R0	115	K	Up	Uncharacterized protein	---	1	0.032	80.165	TVGVSK(1)K	2	-0.39428	1	1.366	1.074	0.842	0.808	1.612	1.306
A0A287B5V1	393	K	Up	60S ribosomal protein L3	RPL3	1	0.00877	89.142	AFMGPLK(1)K	2	-1.7851	2	1.27	1.157	0.772	0.847	1.633	1.342
A0A287B703	207	K	Down	U3 small nucleolar ribonucleoprotein protein MPP10	MPHOSPH10	1	0.00101	106.62	SVVDDK(1)FFK	2	1.072	2	0.735	0.749	1.193	1.313	0.611	0.561
A0A287B8E9	147	K	Up	Cortactin	CTTN	1	0.00395	81.547	TEK(1)HASQK	3	0.13347	1	1.234	1.077	0.957	0.81	1.281	1.306
A0A287B8E9	184	K	Down	Cortactin	CTTN	1	0.00416	80.688	TEK(1)HESQK	3	1.8917	1	0.838	0.747	1.124	1.296	0.74	0.567
A0A287BB26	472	K	Down	Structural maintenance of chromosomes 1A	SMC1A	1	0.0285	45.335	YEPPHIK(1)K	3	0.18478	1	0.707	0.983	1.03	1.223	0.682	0.79
A0A287BBI5	51	K	Up	Glyceraldehyde-3-phosphate dehydrogenase	GAPDH	1	0.00182	101.39	FHGTVK(1)AENGK	3	-0.77742	1	1.618	1.151	0.701	0.661	2.292	1.712
A0A287BBI5	56	K	Up	Glyceraldehyde-3-phosphate dehydrogenase	GAPDH	1	4.33e-05	102.97	AENGK(1)LVINGK	2	0.96452	4	1.244	1.288	0.816	0.699	1.514	1.813
A0A287BBI5	103	K	Up	Glyceraldehyde-3-phosphate dehydrogenase	GAPDH	1	0.000388	101.65	AGAHLK(1)GGAK	3	0.53188	4	1.381	1.012	0.95	0.776	1.445	1.281
A0A287BBI5	184	K	Up	Glyceraldehyde-3-phosphate dehydrogenase	GAPDH	1	0.000514	134.75	TVDGPSGK(1)LWR	2	0.86617	3	1.257	1.17	0.851	0.782	1.467	1.471
A0A287BBI5	205	K	Up	Glyceraldehyde-3-phosphate dehydrogenase	GAPDH	1	0.000268	63.998	GAAQNIIPASTGAAK(1)AVGK	3	-0.17504	1	1.003	1.475	0.669	0.796	1.488	1.823
A0A287BBI5	253	K	Up	Glyceraldehyde-3-phosphate dehydrogenase	GAPDH	1	0.000539	125.82	VVK(1)QASEGPLK	3	0.30362	3	1.401	1.192	0.799	0.697	1.743	1.682
A0A287BBS4	197	K	Up	ATP synthase subunit alpha	ATP5F1A	1	4.13e-08	91.932	QTGK(1)TSIAIDTIINQK	3	-1.3859	1	1.396	1.245	0.675	0.743	2.053	1.648
A0A287BBS4	209	K	Down	ATP synthase subunit alpha	ATP5F1A	1	3.37e-34	203.7	TSIAIDTIINQK(1)R	3	0.42242	2	0.786	0.811	1.192	1.215	0.655	0.656
A0A287BDM3	44	K	Down	Uncharacterized protein	---	1	5.86e-06	127.36	AVDIPHMDIEALK(1)K	3	-0.19649	1	0.813	0.679	1.284	1.257	0.629	0.531
A0A287BET5	133	K	Down	Uncharacterized protein	ALYREF	1	6.6e-05	123.86	K(1)AAVHYDR	3	-0.60613	1	0.769	0.691	1.288	1.273	0.594	0.534
A0A287BFC9	551	K	Down	Dolichyl-diphosphooligosaccharide--protein glycosyltransferase subunit 1	RPN1	1	0.000189	141.37	LDAQVK(1)ELVLK	3	-3.7877	3	0.769	0.671	1.408	1.199	0.543	0.55
A0A287BFJ2	130	K	Up	Clathrin light chain	CLTA	0.999996	0.0304	80.706	KQEAEWK(1)EK	3	-1.0729	1	1.263	1.134	0.883	0.789	1.421	1.413
A0A287BGI6	36	K	Up	Uncharacterized protein	---	1	0.00451	99.815	TATADDK(1)K	2	0.20996	1	1.456	1.076	0.848	0.738	1.708	1.431
A0A287BH52	270	K	Down	Keratin 5	KRT5	1	0.000114	101.3	TAAENEFVNLK(1)K	2	-0.75377	1	0.604	0.905	1.094	1.325	0.549	0.671
A0A287BIV4	205	K	Down	Proteasome subunit alpha type	PSMA4	1	0.0111	65.895	TMDVSK(1)LSAEK	2	0.092739	1	0.887	0.938	1.073	1.107	0.821	0.833
A0A287BJ11	56	K	Down	Small nuclear ribonucleoprotein polypeptide A'	SNRPA1	1	0.0197	70.412	K(1)LDGFPLLR	2	1.8422	1	0.592	0.932	1.051	1.338	0.56	0.685
A0A287BJR8	50	K	Up	Acyl-CoA-binding protein	DBI	1	0.01	75.819	GTSK(1)EDAMK	2	-0.068795	1	1.256	1.211	0.75	0.82	1.666	1.454
A0A287BKD9	128	K	Down	Heterogeneous nuclear ribonucleoprotein A2/B1	HNRNPA2B1	1	2.95e-07	129.38	PGAHVTVK(1)K	3	1.1208	9	0.962	0.759	1.292	1.064	0.74	0.701
A0A287BKD9	129	K	Down	Heterogeneous nuclear ribonucleoprotein A2/B1	HNRNPA2B1	1	3.76e-23	173.03	K(1)LFVGGIKEDTEEHHLR	5	-0.29462	13	0.839	0.78	1.294	1.128	0.644	0.68
A0A287BKD9	189	K	Down	Heterogeneous nuclear ribonucleoprotein A2/B1	HNRNPA2B1	1	1.77e-131	272.24	IVLQK(1)YHTINGHNAEVR	4	-0.16291	8	0.752	0.943	1.096	1.179	0.681	0.786
A0A287BKR2	448	K	Up	Serine hydroxymethyltransferase	SHMT2	1	0.029	64.374	TTK(1)LQDFK	2	-1.0268	1	1.038	1.244	0.771	0.925	1.336	1.322
A0A287BLY0	529	K	Down	Splicing factor 3b subunit 2	SF3B2	1	1.76e-07	105.28	GIEKPPFELPDFIK(1)R	3	0.19904	1	0.73	0.601	1.429	1.282	0.507	0.46
A0A287BM53	101	K	Down	60S ribosomal protein L7a	RPL7A	1	0.000339	103.91	LAHK(1)YRPETK	4	0.58594	1	0.773	0.751	1.291	1.207	0.595	0.612
A0A287BND4	176	K	Down	Translocase of outer mitochondrial membrane 70	TOMM70	0.972952	1.06e-06	111.22	SDEDK(0.973)DK(0.027)EGEALEVK	3	-0.043864	1	0.741	0.861	1.158	1.221	0.635	0.694
A0A287BNK7	54	K	Down	Plectin	PLEC	1	0.00598	73.26	WVNK(1)HLIK	3	0.57695	1	0.844	0.805	1.183	1.186	0.709	0.666
A0A287BNK7	332	K	Down	Plectin	PLEC	1	0.000214	110.97	ETELPAK(1)EADK	2	0.67774	2	0.828	0.947	1.024	1.177	0.803	0.791
A0A287BNK7	444	K	Up	Plectin	PLEC	1	0.00354	58.313	DLDK(1)ADGMIR	2	0.44922	3	1.214	1.399	0.523	0.836	2.307	1.643
A0A287BNK7	638	K	Up	Plectin	PLEC	1	0.00228	111.95	NANMVAK(1)K	2	0.17639	1	1.184	1.098	0.906	0.863	1.297	1.25
A0A287BNK7	770	K	Down	Plectin	PLEC	1	8.63e-05	116.37	GHLSGLAK(1)R	3	-1.2935	2	1.008	0.81	1.256	1.007	0.796	0.79
A0A287BNK7	1071	K	Down	Plectin	PLEC	1	0.00035	138.89	SLSAIYLEK(1)LK	3	-0.70488	3	0.787	0.812	1.359	1.082	0.575	0.738
A0A287BNK7	1473	K	Down	Plectin	PLEC	1	1.02e-13	172.98	AEEAEAQK(1)R	3	-0.30145	3	0.922	0.693	1.361	1.106	0.673	0.616
A0A287BNK7	1572	K	Down	Plectin	PLEC	1	1.6e-05	133.87	QASFVEK(1)TAQLER	3	1.1532	4	0.917	0.807	1.162	1.148	0.784	0.691
A0A287BNK7	1581	K	Up	Plectin	PLEC	1	3.09e-05	122.1	TLK(1)EEHVTVAQLR	3	0.60437	1	1.323	1.21	0.789	0.742	1.666	1.603
A0A287BNK7	1639	K	Up	Plectin	PLEC	1	3.74e-15	130.02	LQAEEVAQQK(1)SLAQAEAEK	3	0.015245	1	1.495	1.142	0.814	0.67	1.827	1.676
A0A287BNK7	1662	K	Up	Plectin	PLEC	1	0.00115	104.82	GK(1)AEEQAVR	2	0.26262	2	1.277	1.058	0.91	0.835	1.394	1.247
A0A287BNK7	1822	K	Down	Plectin	PLEC	1	4.7e-07	97.767	VLAEK(1)LAAISEATR	2	0.30308	2	0.864	0.748	1.303	1.136	0.659	0.648
A0A287BNK7	1843	K	Down	Plectin	PLEC	1	5.06e-15	172.98	EK(1)EAENER	2	1.2246	5	0.895	0.651	1.393	1.142	0.639	0.561
A0A287BNK7	1872	K	Down	Plectin	PLEC	1	7.79e-18	170.11	RLEEQAAQHK(1)ADIEER	4	-0.26584	6	0.796	0.995	0.974	1.192	0.812	0.821
A0A287BNK7	1920	K	Up	Plectin	PLEC	1	0.000672	113.61	ANFEK(1)AAAGK	2	-0.59872	2	1.167	1.155	0.892	0.83	1.3	1.367
A0A287BNK7	1946	K	Down	Plectin	PLEC	1	7.96e-25	190.35	SK(1)EQAEQEAAR	2	1.0122	3	0.948	0.848	1.248	1.016	0.755	0.82
A0A287BNK7	2124	K	Down	Plectin	PLEC	1	1.61e-14	178.46	K(1)EAEQEAAR	2	-0.12926	2	0.969	0.754	1.235	1.109	0.78	0.669
A0A287BNK7	2156	K	Down	Plectin	PLEC	1	3.29e-05	134.77	K(1)FAEQTLR	2	-0.3256	3	0.786	0.972	1.014	1.19	0.77	0.804
A0A287BNK7	2226	K	Down	Plectin	PLEC	1	0.00146	128.85	VQMEELGK(1)LK	2	-2.017	1	0.731	0.755	1.269	1.249	0.573	0.595
A0A287BNK7	2256	K	Down	Plectin	PLEC	1	0.000242	142.1	LLQEEAEK(1)MK	2	1.8789	3	0.896	0.868	1.098	1.152	0.811	0.741
A0A287BNK7	2294	K	Up	Plectin	PLEC	1	0.015	77.192	SLAEK(1)MLK	2	-0.64577	1	1.256	1.203	0.799	0.79	1.561	1.497
A0A287BNK7	2310	K	Up	Plectin	PLEC	1	4.77e-05	92.19	LK(1)AEAELLQQQK	3	-0.94999	2	1.339	1.112	0.779	0.838	1.708	1.305
A0A287BNK7	2392	K	Up	Plectin	PLEC	1	0.00114	108.9	K(1)QAEEIGER	2	1.4228	1	1.417	1.029	0.927	0.751	1.52	1.347
A0A287BNK7	2777	K	Down	Plectin	PLEC	1	1.09e-10	130.72	DPYTGEQISLFQAMK(1)K	3	0.97927	1	0.731	0.984	1.065	1.177	0.682	0.822
A0A287BNK7	3021	K	Down	Plectin	PLEC	1	0.00101	110.08	K(1)LSVYEALK	2	0.71776	1	0.753	0.719	1.333	1.221	0.561	0.579
A0A287BNK7	3734	K	Up	Plectin	PLEC	1	0.000322	95.273	K(1)GLVGPELHDR	3	-0.098388	2	0.992	1.206	0.789	0.982	1.249	1.208
A0A287BNK7	4014	K	Down	Plectin	PLEC	1	0.000944	107.06	LISLFQAMK(1)K	2	-0.36655	1	0.745	0.817	1.307	1.147	0.565	0.7
A0A287BNK7	4322	K	Up	Plectin	PLEC	1	0.000967	59.709	FPVTEAVNK(1)GLVDK	3	-0.80986	1	1.265	1.117	0.863	0.819	1.455	1.341
A0A287BQP1	453	K	Down	RNA-binding protein 25	RBM25	1	0.00103	106.38	EK(1)EAAYQER	2	-0.83891	2	0.884	0.811	1.283	1.073	0.685	0.742
A0A287BQW3	59	K	Down	H1 histone family member 0	H1F0	1	7.24e-06	117.31	SHYK(1)VGENADSQIK	3	-0.26156	1	0.707	0.868	1.126	1.264	0.624	0.675
A0A287BQW3	85	K	Down	H1 histone family member 0	H1F0	1	0.00247	74.853	QTK(1)GVGASGSFR	2	-0.99676	1	0.611	0.567	1.523	1.327	0.399	0.421
A0A287BRC7	19	K	Up	Uncharacterized protein	---	1	0.000554	120.76	SINNAEK(1)R	2	1.4111	2	1.445	1.104	0.758	0.789	1.896	1.374
A0A287BRG3	266	K	Down	Splicing factor proline and glutamine rich	SFPQ	1	0.000844	74.613	SEEK(1)ISDSEGFK	3	-0.26686	1	0.511	1.097	0.914	1.336	0.556	0.807
A0A287BRG3	314	K	Down	Splicing factor proline and glutamine rich	SFPQ	1	0.000251	74.789	LFAK(1)YGEPGEVFINK	3	0.40079	1	0.524	0.853	1.272	1.296	0.41	0.647
A0A287BRG3	325	K	Down	Splicing factor proline and glutamine rich	SFPQ	1	4.74e-05	130.2	YGEPGEVFINK(1)GK	2	0.57525	1	0.678	0.651	1.423	1.274	0.473	0.502
A0A287BRG3	327	K	Down	Splicing factor proline and glutamine rich	SFPQ	1	0.00324	100.02	GK(1)GFGFIK	2	0.04755	3	0.812	0.84	1.205	1.157	0.669	0.714
A0A287BRG3	333	K	Down	Splicing factor proline and glutamine rich	SFPQ	1	0.00125	121.29	GFGFIK(1)LESR	2	-0.35112	1	0.652	0.684	1.417	1.261	0.457	0.533
A0A287BSA0	46	K	Up	DnaJ heat shock protein family (Hsp40) member C5	DNAJC5	1	1.02e-08	103.6	YHPDK(1)NPDNPEAADK	3	0.12397	1	0.938	1.364	0.684	0.942	1.364	1.424
A0A288CFV0	101	K	Up	Serine/arginine-rich splicing factor 6	SRSF6	1	0.0143	78.113	DK(1)YGPPVR	2	0.7427	1	1.184	1.184	0.906	0.776	1.297	1.501
A0A288CFY3	100	K	Down	Tropomyosin alpha-3 chain	TPM3	1	0.0186	85.67	ALK(1)DEEK	2	0.22159	1	0.882	0.777	1.308	1.088	0.67	0.702
A0A288CFY3	116	K	Down	Tropomyosin alpha-3 chain	TPM3	1	0.000508	108.91	EAK(1)HIAEEADR	2	-0.18306	4	0.592	0.885	1.197	1.274	0.492	0.683
A1XQU5	59	K	Down	60S ribosomal protein L27	RPL27	1	0.00376	108.7	KVTAAMGK(1)K	3	-0.23693	1	0.755	0.647	1.395	1.244	0.538	0.512
A1XQU5	98	K	Down	60S ribosomal protein L27	RPL27	1	3.83e-05	117.14	TVVNK(1)DVFRDPALK	3	-0.55129	5	0.882	0.858	1.148	1.132	0.763	0.745
A1XQU5	107	K	Down	60S ribosomal protein L27	RPL27	1	0.0344	76.927	DVFRDPALK(1)R	3	-0.20792	1	0.859	0.845	1.176	1.14	0.725	0.728
A1XQU5	128	K	Down	60S ribosomal protein L27	RPL27	1	0.0116	107.59	NK(1)WFFQK	2	0.32657	2	0.91	0.876	1.142	1.1	0.791	0.782
A1XQU5	133	K	Down	60S ribosomal protein L27	RPL27	1	0.0157	89.369	WFFQK(1)LR	2	1.1259	1	0.774	0.741	1.31	1.2	0.587	0.606
A3EX84	160	K	Up	Galectin	LGALS3	1	0.027	84.568	LALDFK(1)K	2	1.1176	2	1.364	1.08	0.894	0.763	1.517	1.393
A5GFX4	28	K	Up	ATP synthase subunit epsilon, mitochondrial	ATP5E	1	0.00894	85.533	DALK(1)AEFK	2	0.18768	1	1.24	1.13	0.854	0.83	1.44	1.338
A5GFX4	32	K	Up	ATP synthase subunit epsilon, mitochondrial	ATP5E	1	0.00134	102.4	AEFK(1)ANAEK	2	0.75987	2	0.973	1.269	0.745	0.966	1.298	1.291
A8U4R4	538	K	Up	Transketolase	tkt	1	0.0186	52.576	VLDPFTVK(1)PLDR	2	1.7637	1	1.292	1.128	0.809	0.833	1.586	1.331
A8U4R4	543	K	Up	Transketolase	tkt	1	0.0217	76.282	K(1)LILDSAR	2	0.99222	1	0.922	1.331	0.576	1.071	1.589	1.221
A8U4R4	609	K	Up	Transketolase	tkt	1	0.00113	89.805	MFGIDK(1)DAIAR	2	-0.64075	2	1.136	1.216	0.728	0.916	1.549	1.306
A9XFX6	235	K	Down	F-actin capping protein beta subunit	Capzb	1	3.03e-05	96.464	STLNEIYFGK(1)TK	3	0.88589	2	0.908	0.805	1.209	1.12	0.746	0.707
C0MHR2	83	K	Up	Clathrin heavy chain	CLTC	1	0.0025	107.9	VIALK(1)AGK	2	-0.20225	1	1.231	1.045	0.972	0.831	1.26	1.237
C0MHR2	367	K	Down	Clathrin heavy chain	CLTC	1	2.79e-10	118.2	K(1)FNALFAQGNYSEAAK	3	0.19005	1	0.933	0.751	1.33	1.063	0.697	0.694
C0MHR2	1118	K	Up	Clathrin heavy chain	CLTC	1	0.00153	100.02	AQLQK(1)GMVK	2	1.4602	1	0.861	1.569	0.688	0.785	1.245	1.964
D0G0C8	272	K	Down	Chaperonin containing TCP1, subunit 2 (Beta)	CCT2	1	0.000194	101.89	VAEIEHAEK(1)EK	3	0.48019	1	0.716	0.713	1.272	1.3	0.559	0.539
D9U8D1	43	K	Down	Dynein light chain	LC8	1	0.00958	66.692	DIAAHIK(1)K	3	0.20584	1	0.748	0.878	1.238	1.136	0.6	0.76
E1CAJ6	66	K	Up	Protein disulfide isomerase P5	pdi-p5	1	0.0199	94.114	LTPEWK(1)K	2	-0.052854	1	1.186	1.14	0.826	0.881	1.426	1.273
E1CAJ6	159	K	Down	Protein disulfide isomerase P5	pdi-p5	1	0.0208	91.853	SEGSGK(1)K	2	-0.38316	1	0.927	0.733	1.382	1.042	0.667	0.691
E1CAJ6	368	K	Down	Protein disulfide isomerase P5	pdi-p5	1	0.0129	100.19	MK(1)FALLK	2	0.72083	1	0.859	0.819	1.238	1.118	0.689	0.72
F1RFQ7	134	K	Up	GTP-binding nuclear protein Ran	RAN	1	0.000126	121.09	AK(1)SIVFHR	3	-0.37231	1	1.311	1.285	0.557	0.857	2.337	1.475
F1RGJ3	137	K	Up	Heat shock protein family A (Hsp70) member 9	HSPA9	1	0.00106	74.793	QATK(1)DAGQISGLNVLR	2	-0.51005	1	0.836	2.003	0.496	0.512	1.675	3.843
F1RGJ3	245	K	Up	Heat shock protein family A (Hsp70) member 9	HSPA9	1	0.0127	101.43	EAAEK(1)AK	2	0.38751	3	1.307	1.053	0.945	0.791	1.375	1.309
F1RGJ3	291	K	Down	Heat shock protein family A (Hsp70) member 9	HSPA9	1	2.52e-06	138.35	AQFEGIVTDLIK(1)R	3	-1.0103	3	0.758	0.915	1.075	1.219	0.701	0.738
F1RGJ3	584	K	Down	Heat shock protein family A (Hsp70) member 9	HSPA9	1	0.00373	106.6	LFEMAYK(1)K	2	0.72744	1	0.796	0.779	1.205	1.23	0.656	0.623
F1RGJ3	602	K	Down	Heat shock protein family A (Hsp70) member 9	HSPA9	0.998845	1.37e-25	169.25	EGSGSSGSGEQK(0.999)EDQK(0.001)EEK	4	-0.68494	2	0.913	0.747	1.361	1.056	0.667	0.696
F1RGJ3	606	K	Up	Heat shock protein family A (Hsp70) member 9	HSPA9	1	0.0214	82.287	EDQK(1)EEK	2	0.096639	1	1.301	1.108	0.872	0.798	1.48	1.366
F1RHJ2	151	K	Up	Heparin binding growth factor	HDGF	1	0.0138	62.717	NEK(1)GALK	3	-1.277	1	2.05	1.448	0.365	0.315	5.587	4.511
F1RI99	752	K	Up	WAS protein homolog associated with actin, golgi membranes and microtubules	WHAMM	1	0.0164	69.198	QGVK(1)LK(1)K	2	-0.63963	2	1.33	1.541	0.39	0.715	3.399	2.122
F1RI99	754	K	Up	WAS protein homolog associated with actin, golgi membranes and microtubules	WHAMM	1	0.0164	69.198	QGVK(1)LK(1)K	2	-0.63963	2	1.33	1.541	0.39	0.715	3.399	2.122
F1RJM2	192	K	Down	Endoplasmic reticulum resident protein 29	ERP29	1	0.0211	82.645	SVK(1)ETEK	2	1.0689	1	0.792	0.833	1.228	1.159	0.641	0.706
F1RK90	1485	K	Down	Periplakin	PPL	1	0.0227	55.064	K(1)LEHLEK	3	0.16241	1	0.827	0.754	1.303	1.156	0.631	0.641
F1RK90	1628	K	Up	Periplakin	PPL	1	0.000549	135.81	DK(1)DLEIDELQR	2	-1.0923	1	1.284	1.126	0.786	0.858	1.625	1.29
F1RKM0	49	K	Down	Lamin B1	LMNB1	1	0.000373	123.86	LAVYIDK(1)VR	2	0.027509	2	0.856	0.812	1.219	1.142	0.698	0.699
F1RKM0	109	K	Down	Lamin B1	LMNB1	1	0.000511	131.82	LQIELGK(1)FK	2	1.0888	1	0.796	0.541	1.497	1.242	0.528	0.428
F1RKM0	111	K	Down	Lamin B1	LMNB1	1	9.25e-18	170.74	FK(1)AEHDQLLLNYAK	3	0.64344	1	0.654	0.524	1.611	1.27	0.403	0.405
F1RKM0	123	K	Down	Lamin B1	LMNB1	1	0.000927	65.895	AEHDQLLLNYAK(1)K	3	0.073633	1	0.563	0.908	1.1	1.346	0.509	0.663
F1RKM0	134	K	Down	Lamin B1	LMNB1	1	4.56e-05	149.69	ESDLNGAQIK(1)LR	2	2.1415	2	0.665	0.784	1.296	1.247	0.509	0.618
F1RKM0	209	K	Down	Lamin B1	LMNB1	1	6.31e-06	145.43	K(1)NMYEEEINETR	2	-1.1073	2	0.71	0.915	1.1	1.235	0.642	0.728
F1RKM0	342	K	Down	Lamin B1	LMNB1	1	0.00529	115.49	MLSDK(1)ER	2	0.35009	3	0.905	0.77	1.281	1.101	0.701	0.688
F1RLG5	160	K	Down	Receptor expression-enhancing protein	REEP5	1	8.15e-11	147.83	HESQVDNVVSDLK(1)DK	3	-0.62925	2	0.799	0.936	1.063	1.179	0.748	0.78
F1RN28	301	K	Down	Paraspeckle component 1	PSPC1	1	0.000657	99.941	EK(1)LEAEMEAAR	2	-1.2789	1	0.536	0.849	1.266	1.294	0.421	0.645
F1RP44	800	K	Up	Importin-5	IPO5	1	0.0106	62.463	AK(1)LEEHFK	3	0.32663	1	1.035	1.291	0.656	0.969	1.566	1.309
F1RPW9	147	K	Up	Elongation factor 1-gamma	EEF1G	1	2.98e-05	102.87	VLGLLDAHLK(1)TR	3	-1.9418	1	1.33	1.189	0.785	0.763	1.686	1.531
F1RPW9	220	K	Up	Elongation factor 1-gamma	EEF1G	1	0.000976	116.52	K(1)FAESQPK	3	-0.65775	2	1.271	1.131	0.85	0.811	1.485	1.371
F1RPW9	294	K	Down	Elongation factor 1-gamma	EEF1G	1	0.00092	108.77	STFVLDEFK(1)R	2	0.86327	1	0.791	0.838	1.241	1.145	0.633	0.721
F1RQ91	71	K	Up	40S ribosomal protein S4	RPS4X	1	0.0222	81.296	FIK(1)IDGK	2	0.7889	1	1.227	1.103	0.843	0.878	1.446	1.234
F1RQH2	318	K	Up	Pre-mRNA-processing factor 40 homolog A	PRPF40A	1	0.0306	63.216	QAFK(1)ELLK	2	-0.079775	1	1.468	1.281	0.62	0.7	2.354	1.799
F1RQJ4	356	K	Up	UDP-glucose glycoprotein glucosyltransferase 1	UGGT1	1	0.0202	58.04	DLSQNFPTK(1)AR	2	-4.4617	1	1.006	1.264	0.7	0.982	1.428	1.265
F1RQS5	757	K	Down	Cell division cycle 5 like	CDC5L	1	0.000137	128.03	K(1)HEDSAIPR	3	0.87137	2	0.767	0.751	1.077	1.379	0.706	0.535
F1RR69	141	K	Up	Protein SET	SET	1	2.24e-11	108.71	VLSK(1)EFHLNESGDPSSK	3	1.4407	2	1.189	1.509	0.614	0.671	1.924	2.211
F1RRP6	9	K	Up	Annexin	ANXA13	1	0.000877	114.7	AK(1)SDQGFDVDR	2	-0.436	3	1.157	1.342	0.553	0.912	2.079	1.446
F1RRP6	130	K	Up	Annexin	ANXA13	1	0.00918	77.062	EAYQK(1)LFDR	2	3.2817	2	1.498	1.266	0.654	0.668	2.276	1.864
F1RRP6	149	K	Up	Annexin	ANXA13	1	3.61e-05	147.73	SDTSGNLK(1)K	2	1.3363	6	1.364	1.063	0.915	0.763	1.481	1.368
F1RRP6	168	K	Up	Annexin	ANXA13	1	6.27e-09	97.291	EEGDNVDK(1)DLAGQDAK	3	-0.3184	1	1.229	1.326	0.653	0.799	1.869	1.632
F1RS36	96	K	Up	Endoplasmic reticulum chaperone BiP	HSPA5	1	2.16e-49	213.71	NQLTSNPENTVFDAK(1)R	2	1.1639	7	1.234	1.149	0.844	0.825	1.451	1.369
F1RS36	164	K	Up	Endoplasmic reticulum chaperone BiP	HSPA5	1	2.1e-14	127.59	K(1)VTHAVVTVPAYFNDAQR	3	-0.08285	1	1.184	1.083	0.91	0.875	1.294	1.216
F1RS36	185	K	Up	Endoplasmic reticulum chaperone BiP	HSPA5	1	0.00299	54.764	QATK(1)DAGTIAGLNVMR	2	-0.70976	1	1.402	1.199	0.768	0.714	1.815	1.652
F1RS36	213	K	Down	Endoplasmic reticulum chaperone BiP	HSPA5	1	1.82e-16	157.22	IINEPTAAAIAYGLDK(1)R	2	0.5677	2	0.853	0.904	1.058	1.177	0.801	0.754
F1RS36	296	K	Down	Endoplasmic reticulum chaperone BiP	HSPA5	1	0.000485	86.756	AK(1)FEELNMDLFR	2	0.23731	2	0.774	0.968	0.995	1.217	0.773	0.781
F1RS36	417	K	Up	Endoplasmic reticulum chaperone BiP	HSPA5	1	1.04e-17	148.26	K(1)SQIFSTASDNQPTVTIK	3	0.11972	1	1.423	1.145	0.787	0.739	1.797	1.523
F1RS36	493	K	Up	Endoplasmic reticulum chaperone BiP	HSPA5	1	2.65e-07	158.01	NK(1)ITITNDQNR	2	-1.1637	4	1.123	1.185	0.847	0.865	1.318	1.347
F1RS36	523	K	Up	Endoplasmic reticulum chaperone BiP	HSPA5	1	0.00981	86.833	FAEEDK(1)K	3	0.36825	5	1.414	1.159	0.823	0.703	1.706	1.621
F1RTZ0	57	K	Up	Ribosome biogenesis regulatory protein	RRS1	1	0.000152	105.13	HAGPTK(1)EAELR	3	1.1054	2	1.554	1.055	0.868	0.675	1.78	1.537
F1RYV9	128	K	Up	Tubulin alpha chain	TUBA1C	1	0.0172	80.688	LSVDYGK(1)K	2	0.020018	2	1.18	1.225	0.683	0.912	1.715	1.322
F1RYV9	291	K	Up	Tubulin alpha chain	TUBA1C	1	0.00162	63.691	GDVVPK(1)DVNAAIATIK	3	-0.5059	1	1.153	1.242	0.642	0.947	1.784	1.29
F1RYV9	301	K	Up	Tubulin alpha chain	TUBA1C	1	0.0137	43.03	DVNAAIATIK(1)TK	3	-0.70596	1	1.105	1.32	0.675	0.876	1.623	1.481
F1RYV9	359	K	Down	Tubulin alpha chain	TUBA1C	1	0.000225	99.5	LDHK(1)FDLMYAK	3	-0.13536	1	0.978	0.793	1.219	1.073	0.797	0.726
F1S0J8	122	K	Up	Keratin 14	KRT14	1	0.000114	94.538	DWYQK(1)QGPGPAR	2	3.8062	2	1.142	1.3	0.614	0.918	1.851	1.392
F1S1V1	215	K	Down	Sjogren syndrome antigen B	SSB	1	0.00253	77.124	LK(1)LAEHPEMR	3	-1.1083	2	0.669	0.926	1.134	1.226	0.587	0.743
F1S2A8	72	K	Down	B cell receptor associated protein 31	BCAP31	1	0.0246	73.499	K(1)YDDVTEK	2	1.1368	2	0.771	0.788	1.246	1.205	0.614	0.643
F1S2A8	148	K	Down	B cell receptor associated protein 31	BCAP31	1	0.00327	70.438	QAESASEAAK(1)K	3	0.74108	2	0.922	0.793	1.259	1.082	0.728	0.721
F1S2A8	158	K	Down	B cell receptor associated protein 31	BCAP31	1	0.00125	106.67	YMEENDQLK(1)K	3	-1.0554	3	0.993	0.774	1.219	1.084	0.809	0.702
F1S2A8	159	K	Down	B cell receptor associated protein 31	BCAP31	1	0.00592	86.014	K(1)EAAVGGVK	2	-0.1272	1	0.794	0.666	1.359	1.224	0.582	0.535
F1S2A8	176	K	Down	B cell receptor associated protein 31	BCAP31	1	1.08e-30	191.44	LDGGDAGGK(1)VEEENR	3	0.17281	6	0.892	0.888	1.147	1.095	0.772	0.797
F1S2E3	167	K	Up	Peptidyl-prolyl cis-trans isomerase	PPIF	1	5.56e-09	101.2	TDWLDGK(1)HVVFGHVK	4	1.7794	1	1.164	1.139	0.857	0.874	1.35	1.281
F1S300	172	K	Down	Translocated promoter region, nuclear basket protein	TPR	1	0.00165	95.417	NK(1)ELEVAQDR	2	0.040286	2	0.817	0.867	1.223	1.111	0.663	0.767
F1S300	439	K	Down	Translocated promoter region, nuclear basket protein	TPR	1	2.51e-05	114.54	ELENANDLLSATK(1)R	2	0.9161	1	0.681	0.868	1.099	1.305	0.616	0.654
F1S300	927	K	Down	Translocated promoter region, nuclear basket protein	TPR	1	0.000356	131.82	LEHEISHLK(1)K	4	-0.41171	1	0.562	0.797	1.241	1.35	0.45	0.58
F1S300	1027	K	Down	Translocated promoter region, nuclear basket protein	TPR	1	0.00374	69.878	QAEEQVNDLK(1)ER	2	1.2191	1	0.702	0.937	1.053	1.255	0.663	0.733
F1S300	1097	K	Down	Translocated promoter region, nuclear basket protein	TPR	1	0.00835	92.112	EKQELQDDK(1)R	3	0.60576	1	0.724	0.657	1.45	1.214	0.495	0.532
F1S300	1485	K	Down	Translocated promoter region, nuclear basket protein	TPR	1	0.00452	94.692	TEK(1)ESIQK	2	-0.25523	3	0.797	0.824	1.212	1.177	0.653	0.688
F1S3E0	160	K	Up	Transmembrane p24 trafficking protein 9	TMED9	1	0.0142	70.412	DK(1)LSELQLR	2	0.89748	1	1.096	1.199	0.806	0.902	1.349	1.307
F1S3U9	136	K	Down	Uncharacterized protein	PRDX1	1	0.000665	115.57	GLFIIDDK(1)GILR	2	1.1514	1	0.901	0.865	1.196	1.074	0.748	0.792
F1S596	148	K	Down	Glucosidase 2 subunit beta precursor	PRKCSH	1	0.00385	105.52	ILIEDWK(1)K	2	1.4336	1	0.776	0.774	1.333	1.149	0.578	0.662
F1S596	157	K	Up	Glucosidase 2 subunit beta precursor	PRKCSH	1	0.00239	97.734	K(1)LIEIQAGK	2	1.3936	1	1.026	1.18	0.818	0.961	1.246	1.207
F1S596	190	K	Up	Glucosidase 2 subunit beta precursor	PRKCSH	1	0.0286	45.972	EAK(1)DQHR	3	-0.62898	1	1.265	1.004	1.029	0.805	1.221	1.227
F1S5H2	765	K	Up	Actin filament associated protein 1 like 2	AFAP1L2	1	0.00271	106.42	GTVLQK(1)AK	2	-0.95544	1	1.307	1.074	0.956	0.761	1.359	1.388
F1S6R7	62	K	Down	Polypyrimidine tract-binding protein 1	PTBP1	1	0.00135	99.5	VTNLLMLK(1)GK	3	0.81379	4	0.777	0.816	1.155	1.245	0.668	0.644
F1S6R7	406	K	Down	Polypyrimidine tract-binding protein 1	PTBP1	1	3.65e-42	208.28	ITLSK(1)HQNVQLPR	3	0.21351	2	0.625	0.892	1.205	1.236	0.517	0.71
F1S6R7	478	K	Down	Polypyrimidine tract-binding protein 1	PTBP1	1	0.00105	84.753	ILFSSNGGIVK(1)GFK	3	0.3894	2	0.704	0.64	1.46	1.237	0.479	0.509
F1S6R7	481	K	Down	Polypyrimidine tract-binding protein 1	PTBP1	1	0.00389	117.93	GFK(1)FFQK	2	0.11903	2	0.833	0.721	1.367	1.135	0.606	0.625
F1S762	431	K	Down	Non-specific lipid-transfer protein	PODN	1	0.00117	120.57	ANLVFK(1)EIEK	2	0.77017	2	0.814	0.786	1.234	1.186	0.656	0.652
F1S762	446	K	Down	Non-specific lipid-transfer protein	PODN	1	0.00624	79.744	RLEEEGEQFVK(1)K	3	-1.6129	1	0.666	0.766	1.257	1.295	0.527	0.581
F1S8L9	31	K	Up	Heterogeneous nuclear ribonucleoprotein U	HNRNPU	1	0.00133	102.53	GLK(1)AELMER	2	-0.087712	1	1.242	1.058	0.936	0.84	1.319	1.239
F1S8L9	181	K	Up	Heterogeneous nuclear ribonucleoprotein U	HNRNPU	1	0.00086	108.47	GAAK(1)EAAGK	2	1.9883	5	1.358	1.001	0.985	0.776	1.369	1.267
F1S8L9	219	K	Down	Heterogeneous nuclear ribonucleoprotein U	HNRNPU	1	0.000595	118.03	TEQK(1)GGDK	2	-0.65268	2	0.967	0.769	1.243	1.088	0.773	0.694
F1S8L9	312	K	Down	Heterogeneous nuclear ribonucleoprotein U	HNRNPU	1	0.00133	102.52	ASYGVSK(1)GK	2	-0.37915	3	0.957	0.816	1.183	1.094	0.804	0.732
F1S8L9	333	K	Down	Heterogeneous nuclear ribonucleoprotein U	HNRNPU	1	8.33e-08	145.81	HLYTK(1)DIDIHEVR	3	0.51808	2	0.608	1.074	0.915	1.29	0.66	0.819
F1S8L9	417	K	Down	Heterogeneous nuclear ribonucleoprotein U	HNRNPU	1	0.00817	78.548	ISK(1)EVLAER	2	0.019658	1	0.642	0.949	1.115	1.238	0.572	0.754
F1S8L9	497	K	Down	Heterogeneous nuclear ribonucleoprotein U	HNRNPU	1	2.23e-06	132.08	TTWVTK(1)HAAENPGK	3	-0.042382	2	0.853	0.925	1.087	1.132	0.779	0.803
F1S8L9	524	K	Down	Heterogeneous nuclear ribonucleoprotein U	HNRNPU	1	0.0043	101.64	MMVAGFK(1)K	2	-0.26389	4	0.917	0.909	1.124	1.075	0.812	0.832
F1S8L9	525	K	Down	Heterogeneous nuclear ribonucleoprotein U	HNRNPU	1	7.85e-05	128.27	K(1)QMADTGK	2	-0.81439	3	0.931	0.825	1.217	1.076	0.76	0.754
F1S8L9	590	K	Down	Heterogeneous nuclear ribonucleoprotein U	HNRNPU	1	3.46e-06	122.46	AVVVCPK(1)DEDYK	2	0.39419	2	0.648	0.78	1.353	1.218	0.475	0.63
F1S8L9	595	K	Down	Heterogeneous nuclear ribonucleoprotein U	HNRNPU	1	7.31e-09	148.04	DEDYK(1)QR	2	-0.050242	2	0.908	0.69	1.377	1.105	0.656	0.614
F1S9A4	135	K	Up	Uncharacterized protein	NUCB2	1	0.0125	69.864	ADIEEIK(1)SGR	2	0.22925	2	1.226	1.098	0.92	0.822	1.325	1.313
F1S9A4	172	K	Down	Uncharacterized protein	NUCB2	1	6.24e-21	158.45	AK(1)LDSLQDTGIDHHALLK	4	0.45274	1	0.957	0.873	1.169	1.048	0.814	0.819
F1S9A4	250	K	Down	Uncharacterized protein	NUCB2	1	0.0324	79.713	TLTEEK(1)R	2	-1.038	1	0.661	0.849	1.041	1.382	0.631	0.603
F1S9A4	360	K	Up	Uncharacterized protein	NUCB2	1	4.16e-10	157.5	EHVMNEVDTNK(1)DR	3	-0.51737	8	1.103	1.139	0.851	0.922	1.288	1.215
F1S9Q1	71	K	Up	Heat shock cognate 71 kDa protein	HSPA8	1	2.81e-78	233.84	NQVAMNPTNTVFDAK(1)R	3	0.16016	14	1.164	1.116	0.908	0.859	1.273	1.278
F1S9Q1	102	K	Up	Heat shock cognate 71 kDa protein	HSPA8	1	0.00795	86.898	PK(1)VQVEYK	2	-0.43933	2	1.256	1.117	0.755	0.911	1.651	1.206
F1S9Q1	112	K	Down	Heat shock cognate 71 kDa protein	HSPA8	1	9.62e-06	80.733	GETK(1)SFYPEEVSSMVLTK	3	0.011552	1	0.951	0.816	1.152	1.124	0.819	0.714
F1S9Q1	128	K	Up	Heat shock cognate 71 kDa protein	HSPA8	1	0.00156	125.53	MK(1)EIAEAYLGK	2	-0.22023	4	1.204	1.04	0.982	0.849	1.218	1.204
F1S9Q1	159	K	Up	Heat shock cognate 71 kDa protein	HSPA8	1	1.77e-10	132.51	QATK(1)DAGTIAGLNVLR	2	0.022996	3	1.334	1.14	0.729	0.852	1.816	1.315
F1S9Q1	319	K	Up	Heat shock cognate 71 kDa protein	HSPA8	1	0.00107	121.68	GTLDPVEK(1)ALR	2	0.24875	3	1.244	1.074	0.905	0.846	1.366	1.248
F1S9Q1	507	K	Up	Heat shock cognate 71 kDa protein	HSPA8	1	4.56e-19	183.72	ITITNDK(1)GR	2	1.1647	3	1.428	1.13	0.826	0.72	1.716	1.544
F1S9Q1	512	K	Up	Heat shock cognate 71 kDa protein	HSPA8	1	0.00359	97.597	LSK(1)EDIER	2	2.2515	1	1.466	1.128	0.766	0.743	1.904	1.493
F1S9Q1	524	K	Up	Heat shock cognate 71 kDa protein	HSPA8	1	0.000314	118.28	MVQEAEK(1)YK	2	0.72568	2	1.113	1.204	0.839	0.859	1.318	1.378
F1S9Q1	589	K	Down	Heat shock cognate 71 kDa protein	HSPA8	1	1.14e-28	190.11	NQTAEK(1)EEFEHQQK	3	0.8817	1	0.88	0.86	1.109	1.162	0.789	0.728
F1SA98	9	K	Up	Tyrosine 3-monooxygenase/tryptophan 5-monooxygenase activation protein theta	YWHAQ	1	0.00108	91.867	TELIQK(1)AK	2	-0.99732	2	1.018	1.218	0.754	0.979	1.341	1.223
F1SA98	11	K	Up	Tyrosine 3-monooxygenase/tryptophan 5-monooxygenase activation protein theta	YWHAQ	1	4.24e-07	155.53	AK(1)LAEQAER	2	1.8137	5	1.355	1.116	0.865	0.757	1.558	1.449
F1SAD9	164	K	Up	Protein disulfide-isomerase	PDIA4	1	0.00165	95.417	TQEEIVAK(1)VK	2	0.14959	3	1.052	1.265	0.772	0.891	1.354	1.396
F1SAD9	212	K	Up	Protein disulfide-isomerase	PDIA4	1	0.0275	70.908	K(1)LAPEYER	2	-0.69791	1	1.302	1.18	0.803	0.777	1.611	1.493
F1SAD9	350	K	Up	Protein disulfide-isomerase	PDIA4	1	0.00573	90.906	FLK(1)VSPDK	2	0.24268	3	1.266	1.175	0.83	0.787	1.516	1.467
F1SAD9	438	K	Up	Protein disulfide-isomerase	PDIA4	1	0.0112	82.417	SK(1)VLEVAK	2	-0.94441	2	1.144	1.158	0.87	0.858	1.307	1.327
F1SAD9	486	K	Down	Protein disulfide-isomerase	PDIA4	1	3.5e-13	159.34	K(1)FAMEPDDFDANALR	3	0.26984	3	0.853	0.816	1.197	1.158	0.709	0.692
F1SAD9	507	K	Down	Protein disulfide-isomerase	PDIA4	1	0.00408	103.55	SFVTAFK(1)K	2	1.3854	1	0.817	0.797	1.295	1.126	0.627	0.695
F1SAE9	1629	K	Down	Laminin subunit beta 1	LAMB1	1	0.0228	88.37	NVEELK(1)R	2	-0.3948	1	0.831	0.879	1.094	1.188	0.756	0.727
F1SB42	450	K	Up	Ezrin	EZR	1	0.000672	113.24	AK(1)EAQDDLVK	2	0.17624	1	1.169	1.33	0.727	0.779	1.598	1.679
F1SC47	409	K	Down	Delta-1-pyrroline-5-carboxylate synthase	ALDH18A1	1	0.0121	77.674	K(1)DMEEAEGR	2	0.17315	1	0.644	0.964	1.135	1.204	0.564	0.787
F1SD69	219	K	Down	Legumain	LGMN	1	0.000573	94.409	LVQFQGLK(1)HK	3	-0.098688	1	0.577	0.739	1.447	1.236	0.396	0.588
F1SDN2	202	K	Down	Uncharacterized protein	HADHB	1	0.00319	100.57	LSLISK(1)FR	2	0.85755	1	0.829	0.824	1.242	1.132	0.663	0.715
F1SDN2	254	K	Up	Uncharacterized protein	HADHB	1	0.00329	111.04	SHSLAK(1)K	3	-1.2757	2	1.333	0.996	1.004	0.784	1.319	1.248
F1SDR7	11	K	Up	Tyrosine 3-monooxygenase/tryptophan 5-monooxygenase activation protein beta	YWHAB	1	0.00543	91.867	SELVQK(1)AK	2	-0.049196	2	1.391	1.182	0.813	0.703	1.701	1.652
F1SDR7	13	K	Up	Tyrosine 3-monooxygenase/tryptophan 5-monooxygenase activation protein beta	YWHAB	1	4.24e-07	155.53	AK(1)LAEQAER	2	1.8137	5	1.355	1.116	0.865	0.757	1.558	1.449
F1SDV7	166	K	Down	DNA topoisomerase I	TOP1	1	0.00288	94.767	K(1)LEEEEDGK	2	0.2602	2	0.715	0.926	1.144	1.185	0.62	0.769
F1SDV7	222	K	Down	DNA topoisomerase I	TOP1	1	0.00933	71.692	WK(1)FLEHK	3	1.1308	1	0.578	0.775	1.377	1.253	0.417	0.608
F1SDV7	623	K	Down	DNA topoisomerase I	TOP1	1	0.00357	107.55	K(1)EQLADAR	2	1.0488	2	0.853	0.724	1.343	1.136	0.631	0.627
F1SEN1	64	K	Up	Annexin	ANXA8	1	0.00431	95.358	SFK(1)AQFGK	2	1.6163	2	1.325	1.17	0.727	0.829	1.812	1.389
F1SFV7	22	K	Up	Protein S100	S100A4	1	0.00795	86.898	YSGK(1)EGDK	2	-4.0825	1	1.258	1.062	0.954	0.81	1.312	1.289
F1SFV7	31	K	Up	Protein S100	S100A4	1	0.0178	86.67	LNK(1)SELK	2	1.1138	2	1.347	1.133	0.798	0.797	1.676	1.398
F1SFV7	35	K	Up	Protein S100	S100A4	1	0.000969	107.11	SELK(1)ELLTR	2	1.0402	2	1.457	1.163	0.743	0.73	1.949	1.564
F1SGG1	180	K	Up	Keratin 18	KRT18	1	1.57e-05	151.55	K(1)VIDDTNVTR	2	0.77547	4	1.214	1.223	0.751	0.837	1.606	1.435
F1SGG1	310	K	Up	Keratin 18	KRT18	1	1.61e-10	168.82	NLK(1)ATLENSLR	2	0.53569	2	1.716	1.269	0.614	0.541	2.781	2.305
F1SGG1	400	K	Up	Keratin 18	KRT18	1	0.00131	100.02	QTIQK(1)TTTLR	2	0.26882	2	1.477	1.329	0.598	0.662	2.456	1.973
F1SGG1	410	K	Up	Keratin 18	KRT18	1	1.38e-05	84.753	LVDGK(1)VVSETSDTK	3	-0.58786	2	1.294	1.312	0.598	0.809	2.152	1.594
F1SHL9	62	K	Up	Pyruvate kinase	PKM	1	6.34e-10	167.18	SVETLK(1)EMIK	3	-0.3085	3	1.355	1.013	0.924	0.814	1.458	1.223
F1SHL9	115	K	Up	Pyruvate kinase	PKM	1	1.31e-05	88.075	PVAVALDTK(1)GPEIR	2	-0.53562	1	1.126	1.319	0.673	0.863	1.662	1.503
F1SHL9	135	K	Up	Pyruvate kinase	PKM	1	0.00174	118.87	GSGTAEVELK(1)K	3	0.78877	2	1.361	1.399	0.584	0.683	2.313	2.014
F1SHL9	247	K	Up	Pyruvate kinase	PKM	1	6.68e-22	139.15	K(1)AADVHEVR	3	-0.47544	4	1.347	1.028	0.957	0.78	1.398	1.295
F1SHL9	266	K	Up	Pyruvate kinase	PKM	1	0.017	87.639	NIK(1)IISK	2	0.58435	3	1.396	1.071	0.839	0.792	1.655	1.331
F1SHR3	42	K	Down	ATPase H+ transporting V1 subunit E1	ATP6V1E1	1	0.00362	81.239	AEEEFNIEK(1)GR	2	-0.6387	1	0.486	1.057	0.976	1.347	0.495	0.771
F1SJ34	117	K	Down	Cytochrome c oxidase subunit 5A	COX5A	1	0.00209	114.28	DK(1)AGPHK	3	1.5344	4	1.046	0.783	1.275	0.992	0.815	0.777
F1SJB5	157	K	Up	Annexin	ANXA1	1	0.017	87.639	VYK(1)EELK	2	0.4056	2	1.309	1.212	0.731	0.797	1.781	1.495
F1SJB5	185	K	Up	Annexin	ANXA1	1	1.28e-06	152.64	ALLSLAK(1)GDR	2	0.65638	4	1.343	1.137	0.842	0.761	1.584	1.47
F1SJB5	245	K	Up	Annexin	ANXA1	1	0.00155	94.309	YSK(1)HDMNK	3	0.41513	4	1.412	1.131	0.816	0.738	1.719	1.508
F1SJH7	154	K	Up	Mitogen-activated protein kinase kinase 5	MAP2K5	1	0.0205	66.989	K(1)ILANGQMNEQDIR	3	3.7866	1	1.617	1.134	0.668	0.707	2.406	1.577
F1SJQ6	85	K	Down	60S ribosomal protein L14	RPL14	1	0.013	62.732	ADINAK(1)WAATR	2	3.0808	1	0.581	0.866	1.194	1.302	0.483	0.655
F1SJX1	309	K	Down	Electron transfer flavoprotein subunit alpha, mitochondrial	ETFA	1	0.000573	125.75	VVPEMTELLK(1)K	2	0.34539	2	0.894	0.871	1.12	1.134	0.793	0.755
F1SK45	29	K	Down	GTP:AMP phosphotransferase AK3, mitochondrial	AK3	1	0.00109	99.815	ITK(1)HFELK	3	0.47589	1	0.645	0.907	1.241	1.178	0.517	0.757
F1SKJ1	860	K	Up	Myosin heavy chain 9	MYH9	1	0.0195	66.56	EK(1)QLAAENR	2	-1.847	1	1.348	1.144	0.832	0.759	1.61	1.483
F1SKJ1	1024	K	Up	Myosin heavy chain 9	MYH9	1	3.82e-06	106.14	NK(1)HEAMITDLEER	3	0.59937	4	1.036	1.367	0.745	0.821	1.383	1.636
F1SKJ1	1081	K	Up	Myosin heavy chain 9	MYH9	1	0.000833	101.39	K(1)EEELQAALAR	2	-0.87776	2	1.16	1.301	0.697	0.838	1.655	1.525
F1SKJ1	1174	K	Up	Myosin heavy chain 9	MYH9	1	0.0195	78.488	K(1)TLEEEAK	2	-0.10405	1	1.272	1.301	0.675	0.776	1.872	1.65
F1SKJ1	1218	K	Up	Myosin heavy chain 9	MYH9	1	0.0307	60	AK(1)QTLENER	2	-3.5287	1	1.386	1.179	0.784	0.733	1.758	1.581
F1SKJ1	1239	K	Up	Myosin heavy chain 9	MYH9	1	5.5e-05	90.412	VLLQGK(1)GDSEHK	3	0.17343	2	1.131	1.395	0.716	0.748	1.57	1.833
F1SKJ1	1273	K	Up	Myosin heavy chain 9	MYH9	1	0.00158	99.283	TELADK(1)VSK	2	-0.71731	3	1.339	1.215	0.697	0.799	1.909	1.496
F1SKJ1	1323	K	Up	Myosin heavy chain 9	MYH9	1	0.0112	82.417	QK(1)LSLSTK	2	-0.0040828	1	1.129	1.474	0.632	0.736	1.777	1.97
F1SKJ1	1329	K	Up	Myosin heavy chain 9	MYH9	1	0.00345	98.044	LSLSTK(1)LK	2	-0.087751	1	1.467	1.294	0.609	0.697	2.392	1.826
F1SKJ1	1351	K	Up	Myosin heavy chain 9	MYH9	1	1.07e-18	180.61	EQLEEEEEAK(1)R	3	-1.4543	4	1.272	1.116	0.836	0.837	1.513	1.31
F1SKJ1	1721	K	Up	Myosin heavy chain 9	MYH9	1	0.00369	89.886	GALALEEK(1)R	2	3.9087	2	1.394	1.283	0.624	0.747	2.219	1.689
F1SKJ1	1864	K	Up	Myosin heavy chain 9	MYH9	1	0.00429	85.963	DQADK(1)ASTR	2	1.8833	1	1.621	1.296	0.689	0.521	2.34	2.444
F1SKQ0	42	K	Down	DEAD-box helicase 17	DDX17	1	0.00214	99.752	K(1)WDLSELPK	2	0.47851	1	0.805	0.917	1.089	1.173	0.735	0.768
F1SLA0	348	K	Down	ATP synthase subunit beta	ATP5F1B	1	0.000669	111.52	GVQK(1)ILQDYK	2	0.092474	2	0.652	0.996	1.06	1.226	0.61	0.798
F1SLI6	948	K	Down	SWI/SNF related, matrix associated, actin dependent regulator of chromatin subfamily c member 1	SMARCC1	1	0.000228	128.01	AK(1)HLAAVEER	3	1.392	6	0.776	0.874	1.14	1.199	0.675	0.717
F1SLI6	991	K	Down	SWI/SNF related, matrix associated, actin dependent regulator of chromatin subfamily c member 1	SMARCC1	1	0.000484	133.42	EK(1)EALEQQR	2	-0.53097	3	0.728	0.837	1.202	1.222	0.602	0.673
F1SMV6	232	K	Up	Nucleolin	NCL	1	0.0198	84.244	AVPVK(1)AK	2	0.36277	1	1.595	1.237	0.654	0.627	2.424	1.94
F1SMV6	307	K	Up	Nucleolin	NCL	1	0.0145	109.01	AAPEAK(1)K	2	0.31364	4	1.437	1.107	0.86	0.71	1.66	1.534
F1SMV6	411	K	Up	Nucleolin	NCL	1	5.54e-05	147.74	TLLAK(1)NLPYK	3	1.1911	5	1.19	1.11	0.919	0.836	1.287	1.306
F1SMV6	437	K	Up	Nucleolin	NCL	1	0.00873	111.17	LVSK(1)DGK	2	-0.31139	3	1.296	1.063	0.943	0.791	1.365	1.321
F1SMV6	442	K	Up	Nucleolin	NCL	1	0.00105	102.87	SK(1)GIAYIEFK	2	-1.9212	2	1.437	1.237	0.714	0.693	2.001	1.755
F1SMV6	585	K	Up	Nucleolin	NCL	1	0.000992	134.99	SQPSK(1)TLFVK	2	0.40543	2	1.374	1.138	0.813	0.761	1.679	1.473
F1SMV6	640	K	Up	Nucleolin	NCL	1	1.11e-16	165.49	AAK(1)EAMEDGEIDGNK	3	0.50312	5	1.165	1.174	0.803	0.882	1.442	1.309
F1SMZ6	56	K	Up	10 kDa heat shock protein, mitochondrial	HSPE1	1	2.56e-20	185.95	GK(1)GGEIQPVSVK	3	-0.34666	8	1.258	1.164	0.811	0.818	1.543	1.398
F1SMZ7	364	K	Down	60 kDa heat shock protein, mitochondrial	HSPD1	1	0.0202	83.137	GDK(1)AQIEK	2	-0.38723	2	0.92	0.807	1.272	1.06	0.719	0.749
F1SPG0	20	K	Down	RAB7A, member RAS oncogene family	RAB7A	1	0.0181	99.139	K(1)FSNQYK	2	0.3647	1	0.815	0.759	1.282	1.175	0.632	0.635
F1SPP8	173	K	Up	Cytoskeleton-associated protein 4	CKAP4	1	0.000276	112.73	SSQHK(1)QDLTEK	3	-2.3476	3	1.299	0.99	1.066	0.766	1.21	1.272
F1SPP8	255	K	Up	Cytoskeleton-associated protein 4	CKAP4	1	0.0256	62.088	SQK(1)EINDVK	2	-0.93895	1	1.555	1.301	0.594	0.638	2.6	2.005
F1SPP8	263	K	Down	Cytoskeleton-associated protein 4	CKAP4	1	2.91e-07	94.281	AK(1)VASLEDSEGYKQDLK	3	0.32583	1	0.794	0.813	1.192	1.205	0.662	0.663
F1SQT3	293	K	Down	Phosphate carrier protein, mitochondrial	SLC25A3	1	8.42e-10	161.87	EK(1)GSSASQVLR	2	-0.47219	2	0.968	0.842	1.155	1.082	0.832	0.765
F1SUF2	209	K	Up	Hexokinase-1	HK1	1	0.00113	87.895	NK(1)EGLHNAK	3	-0.21744	2	1.476	1.031	0.959	0.683	1.528	1.483
F1SUF2	363	K	Up	Hexokinase-1	HK1	1	0.00734	83.862	AEMDLGLK(1)K	2	4.1727	1	1.03	1.269	0.757	0.916	1.354	1.363
F1SUG7	286	K	Down	DEAD (Asp-Glu-Ala-Asp) box helicase 21	DDX21	1	0.00238	111.61	DFSDITK(1)K	2	-0.15978	2	0.617	0.87	1.244	1.234	0.493	0.692
F1SUG7	333	K	Down	DEAD (Asp-Glu-Ala-Asp) box helicase 21	DDX21	1	0.0245	77.732	LDLTK(1)LK	2	-0.14758	1	0.52	0.613	1.482	1.379	0.348	0.437
F1SUG7	482	K	Down	DEAD (Asp-Glu-Ala-Asp) box helicase 21	DDX21	1	0.00537	92.051	EITLK(1)GFR	2	1.1165	2	0.885	0.911	1.136	1.086	0.774	0.826
F1SUG7	596	K	Down	DEAD (Asp-Glu-Ala-Asp) box helicase 21	DDX21	1	6.56e-15	119.51	LLDSVPPTAIGHFK(1)QSAEK	3	0.4116	3	0.777	0.8	1.16	1.257	0.666	0.626
F1SUG7	669	K	Down	DEAD (Asp-Glu-Ala-Asp) box helicase 21	DDX21	1	0.00101	82.529	EQLGEDIDSK(1)VK	2	1.6294	1	0.599	0.786	1.262	1.317	0.472	0.587
F1SUG7	671	K	Down	DEAD (Asp-Glu-Ala-Asp) box helicase 21	DDX21	1	0.0058	90.709	VK(1)GMVFLK	2	0.65949	1	0.583	0.774	1.203	1.387	0.482	0.549
F1SUG7	677	K	Down	DEAD (Asp-Glu-Ala-Asp) box helicase 21	DDX21	1	0.00167	111.82	GMVFLK(1)GK	2	0.76888	3	0.73	0.825	1.26	1.187	0.575	0.683
F1SV40	64	K	Down	Splicing factor 3a subunit 3	SF3A3	1	0.00202	89.805	DLYDDK(1)DGLR	2	-0.93645	1	0.628	0.772	1.22	1.344	0.512	0.565
F1SV47	692	K	Down	Thyroid hormone receptor-associated protein 3	THRAP3	1	0.00049	94.465	K(1)HGLAHDEMK	4	-0.7341	1	0.614	0.793	1.474	1.133	0.414	0.689
F1SV89	189	K	Down	Histone deacetylase	HDAC1	1	0.0187	72.23	DIGAGK(1)GK	2	-0.1155	2	0.609	0.866	1.148	1.318	0.527	0.646
F2Z4X6	56	K	Down	Translocase of outer mitochondrial membrane 20	TOMM20	1	0.0164	65.842	AGLSK(1)LPDLK	2	-1.2918	1	0.745	0.941	1.093	1.189	0.677	0.779
F2Z4Y8	147	K	Up	40S ribosomal protein S11	RPS11	1	0.0177	73.499	VTK(1)AAGTK	2	-0.12678	1	1.307	1.11	0.907	0.762	1.43	1.432
F2Z4Z1	77	K	Up	Uncharacterized protein	YWHAG	1	0.017	72.531	TSADGNEK(1)K	2	-0.047759	1	1.549	1.164	0.746	0.662	2.062	1.73
F2Z517	165	K	Down	Arginine and glutamate rich 1	ARGLU1	1	0.0121	91.064	RVEEAK(1)R	2	-0.4706	1	1.003	0.833	1.243	0.997	0.802	0.822
F2Z565	163	K	Up	Solute carrier family 25 member 5	SLC25A5	1	0.00221	85.813	GLGDCLVK(1)IYK	2	-0.097146	2	1.361	1.184	0.628	0.867	2.152	1.342
F2Z565	272	K	Down	Solute carrier family 25 member 5	SLC25A5	1	0.00015	91.62	AFFK(1)GAWSNVLR	2	-0.44311	1	0.902	0.823	1.208	1.107	0.743	0.73
F2Z580	12	K	Down	Histone H2B	HIST1H2BB	1	0.00981	101.64	SAPAPK(1)K	3	-0.15907	11	0.944	0.711	1.378	1.058	0.681	0.661
F2Z584	12	K	Down	Histone H2B	HIST1H2BD	1	0.00981	101.64	SAPAPK(1)K	3	-0.15907	11	0.944	0.711	1.378	1.058	0.681	0.661
F2Z587	37	K	Down	Histone H2A	LOC110261483	1	0.00145	124.08	K(1)GNYSER	2	2.3249	2	0.566	0.567	1.582	1.313	0.356	0.424
F2Z587	96	K	Down	Histone H2A	LOC110261483	1	0.000423	105.95	NDEELNK(1)LLGR	2	-0.11416	3	0.75	0.762	1.245	1.249	0.598	0.6
F2Z5B4	127	K	Down	Uncharacterized protein	HNRNPA3	0.999806	0.00447	73.057	K(1)IFVGGIKEDTEEYNLR	3	1.431	1	0.699	0.688	1.386	1.249	0.501	0.542
F2Z5B4	134	K	Down	Uncharacterized protein	HNRNPA3	1	1.15e-07	92.38	IFVGGIK(1)EDTEEYNLR	2	-0.028166	1	0.689	0.775	1.257	1.268	0.544	0.601
F2Z5B4	148	K	Up	Uncharacterized protein	HNRNPA3	1	0.00172	111.61	DYFEK(1)YGK	2	1.6898	1	1.128	1.143	0.823	0.921	1.363	1.221
F2Z5B4	199	K	Up	Uncharacterized protein	HNRNPA3	1	2.57e-08	155.14	YHTINGHNCEVK(1)K	3	-2.3439	3	1.241	1.062	0.916	0.852	1.346	1.226
F2Z5E6	191	K	Down	Ribosomal protein S5	RPS5	1	0.000921	108.98	GSSNSYAIK(1)K	2	0.26919	2	0.843	0.878	1.047	1.218	0.8	0.709
F2Z5G2	388	K	Down	Structural maintenance of chromosomes protein	SMC3	1	0.00156	96.82	GSQFTSK(1)EER	2	-1.41	1	0.707	0.704	1.28	1.31	0.549	0.528
F2Z5G2	409	K	Up	Structural maintenance of chromosomes protein	SMC3	1	0.00216	123.95	SLDQAINDK(1)K	3	1.0015	3	1.154	1.136	0.84	0.898	1.366	1.244
F2Z5G2	486	K	Down	Structural maintenance of chromosomes protein	SMC3	1	3.56e-12	162.88	EENAEQQALAAK(1)R	2	-0.45593	1	0.728	0.817	1.264	1.192	0.573	0.674
F2Z5L5	125	K	Down	Histone H2A	LOC106510170	0.99977	0.0101	64.711	KTESHK(1)AK	4	-0.43994	4	0.983	0.729	1.323	1.054	0.738	0.68
F2Z5W4	76	K	Down	Heterogeneous nuclear ribonucleoprotein H3	HNRNPH3	1	0.00029	113.22	EIAENALGK(1)HK	3	0.8303	1	0.776	0.861	1.161	1.195	0.665	0.708
F6PYW2	64	K	Down	Histone cluster 1 H1 family member d	HIST1H1D	1	0.0181	84.605	NGVSLAALK(1)K	2	-1.3966	1	0.547	0.973	1.201	1.213	0.452	0.789
F6QA08	104	K	Down	Protein disulfide-isomerase	PDIA3	1	0.000159	82.925	YGVSGYPTLK(1)IFR	2	0.11551	1	0.752	0.895	1.083	1.238	0.689	0.711
F6QA08	151	K	Down	Protein disulfide-isomerase	PDIA3	1	1.53e-06	133.16	FISDK(1)DASVVGFFK	3	-0.32152	1	0.949	0.835	1.153	1.104	0.817	0.743
F6QA08	334	K	Down	Protein disulfide-isomerase	PDIA3	1	9.77e-06	143.05	GEK(1)FVMQEEFSR	3	-0.38961	3	0.781	0.92	1.197	1.103	0.648	0.82
F6QA08	361	K	Down	Protein disulfide-isomerase	PDIA3	1	0.00093	122.78	FLQDYFDGNLK(1)R	2	0.54949	1	0.864	0.881	1.126	1.139	0.762	0.76
F6QA08	416	K	Down	Protein disulfide-isomerase	PDIA3	1	0.0214	82.287	YK(1)ELGEK	2	0.68344	1	0.845	0.747	1.246	1.194	0.675	0.615
F6QA08	424	K	Up	Protein disulfide-isomerase	PDIA3	1	0.00366	90.05	K(1)DPNIIIAK	2	-0.32236	1	1.324	1.14	0.786	0.815	1.674	1.374
G9F6X8	106	K	Up	Protein disulfide-isomerase	P4HB	1	5.94e-07	153.75	FFK(1)DGDTASPR	2	-0.55853	4	1.189	1.117	0.932	0.82	1.268	1.339
G9F6X8	200	K	Down	Protein disulfide-isomerase	P4HB	1	0.000543	113.76	YQLDK(1)DGVVLFK	2	-0.17086	1	0.866	0.922	1.089	1.125	0.79	0.806
G9F6X8	207	K	Up	Protein disulfide-isomerase	P4HB	1	0.0103	87.639	DGVVLFK(1)K	2	-0.10218	1	1.246	1.118	0.845	0.845	1.464	1.301
G9F6X8	208	K	Down	Protein disulfide-isomerase	P4HB	1	7.6e-07	109.79	K(1)FDEGRNDFEGEVTK	3	-0.090225	1	0.774	0.732	1.266	1.244	0.608	0.579
G9F6X8	271	K	Up	Protein disulfide-isomerase	P4HB	1	3.34e-06	104.7	SASDHASK(1)LSSFR	3	0.67085	2	1.226	1.095	0.894	0.846	1.363	1.273
G9F6X8	328	K	Down	Protein disulfide-isomerase	P4HB	1	0.00382	55.851	YK(1)PESAELTAEAIR	2	1.0908	1	0.752	0.938	1.1	1.183	0.68	0.779
G9F6X8	467	K	Up	Protein disulfide-isomerase	P4HB	1	0.0157	107.9	TLDGFK(1)K	2	1.3266	1	1.363	1.071	0.923	0.75	1.467	1.404
I3L5B2	144	K	Down	40S ribosomal protein S7	RPS7	1	0.002	90.15	LIK(1)VHLDK	3	-0.21086	2	0.858	0.767	1.169	1.225	0.728	0.616
I3L5B2	167	K	Down	40S ribosomal protein S7	RPS7	1	0.000923	117.25	VETFSGVYK(1)K	3	0.78815	4	0.846	0.919	1.102	1.132	0.762	0.799
I3L5Z2	233	K	Up	Prolyl 3-hydroxylase 1	P3H1	1	0.0017	94.688	DLQEMK(1)EESR	2	-1.3137	1	1.093	1.554	0.51	0.776	2.131	1.97
I3L693	243	K	Down	Heterogeneous nuclear ribonucleoprotein R	HNRNPR	1	0.0116	107.59	VK(1)VLFVR	2	-1.0636	2	0.822	0.778	1.358	1.093	0.601	0.7
I3L6D2	124	K	Up	Ras-related protein Rab-1A	RAB1A	1	0.00779	83.182	K(1)VVDYTTAK	2	0.024046	1	1.195	1.125	0.892	0.838	1.332	1.319
I3L6I8	208	K	Down	EBNA1 binding protein 2	EBNA1BP2	1	1.21e-10	100.02	GFSDK(1)LDFLEGDQKPVAR	3	1.0061	1	0.604	0.572	1.378	1.441	0.436	0.391
I3L7T4	414	K	Down	Lon protease homolog, mitochondrial	LONP1	0.96345	9.39e-07	130.27	ELGLEK(0.037)DDK(0.963)DAIEEK	3	-1.9564	1	0.906	0.809	1.244	1.09	0.724	0.73
I3L7T4	498	K	Down	Lon protease homolog, mitochondrial	LONP1	1	9.64e-11	115.66	AQAVLEEDHYGMEDVK(1)K	3	0.83668	1	0.762	0.984	0.986	1.216	0.769	0.795
I3L816	98	K	Down	Heterogeneous nuclear ribonucleoprotein H1	HNRNPH1	1	2.07e-05	43.732	SNNVEMDWVLK(1)HTGPNSPDTANDGFVR	3	-0.39506	1	0.64	0.935	1.089	1.273	0.585	0.722
I3L816	185	K	Down	Heterogeneous nuclear ribonucleoprotein H1	HNRNPH1	1	0.00118	104.43	YIEIFK(1)SSR	2	0.25347	1	0.773	0.823	1.277	1.146	0.602	0.706
I3L9J4	127	K	Down	Uncharacterized protein	CCT6A	1	4.11e-11	164.53	IITEGFEAAK(1)EK	2	-0.11533	2	0.833	0.749	1.292	1.166	0.64	0.632
I3L9M7	111	K	Down	Leucine-rich repeat-containing protein 59	LRRC59	1	0.00312	101.38	SLK(1)WLDLK	2	1.9111	2	0.923	0.742	1.278	1.118	0.719	0.652
I3L9M7	180	K	Down	Leucine-rich repeat-containing protein 59	LRRC59	1	0.0253	76.221	AK(1)EAQER	2	1.2116	3	0.925	0.865	1.202	1.051	0.763	0.809
I3LAJ9	121	K	Down	Histone H2B	LOC110261669	1	5.63e-05	143.24	AVTK(1)YTSSK	3	0.29957	8	0.933	0.76	1.339	1.046	0.693	0.715
I3LDC7	65	K	Up	Isocitrate dehydrogenase [NADP]	IDH1	1	0.0255	72.607	DAAEAIK(1)K	2	-0.173	1	1.075	1.336	0.716	0.849	1.492	1.547
I3LE16	93	K	Down	PGAM family member 5, mitochondrial serine/threonine protein phosphatase	PGAM5	1	0.00437	98.997	LDHYK(1)AK	3	0.5161	1	0.787	0.74	1.337	1.171	0.584	0.621
I3LER5	85	K	Down	Cytochrome c oxidase subunit 4 isoform 1, mitochondrial	COX4I1	1	1.43e-32	198.03	LK(1)FNESFAEMNR	2	0.66319	2	0.65	0.801	1.315	1.224	0.491	0.643
I3LGC2	826	K	Up	Ribosome binding protein 1	RRBP1	1	0.0068	88.495	ELAAEK(1)AK	2	-0.2867	1	1.293	1.158	0.794	0.813	1.619	1.4
I3LH57	352	K	Up	TOG array regulator of axonemal microtubules 2	TOGARAM2	1	0.024	60.255	VTISK(1)SAQEK	2	-0.70746	2	0.376	2.03	0.232	1.02	1.608	1.956
I3LIC2	288	K	Down	Leucine rich pentatricopeptide repeat containing	LRPPRC	1	3.39e-05	105.65	GDIDHVK(1)QTLEK	3	0.3951	2	0.748	0.877	1.207	1.163	0.617	0.741
I3LIC2	761	K	Down	Leucine rich pentatricopeptide repeat containing	LRPPRC	1	0.00405	105.39	VLGK(1)HGK	3	0.29717	2	0.711	0.738	1.388	1.188	0.508	0.61
I3LIC2	1332	K	Down	Leucine rich pentatricopeptide repeat containing	LRPPRC	1	0.0037	106.88	LNDLFLK(1)R	2	-0.15881	1	0.876	0.723	1.282	1.168	0.679	0.608
I3LIP6	52	K	Up	Aspartate beta-hydroxylase	ASPH	1	0.0187	72.23	VLLGLK(1)ER	2	-0.11637	1	1.319	1.112	0.91	0.75	1.441	1.459
I3LJ05	185	K	Down	Uncharacterized protein	C13H21orf33	1	3.06e-05	132.72	ALGAK(1)HR	3	-0.59774	2	1.003	0.748	1.345	1.004	0.74	0.732
I3LK59	60	K	Up	Enolase 1	ENO1	1	0.0031	101.65	YMGK(1)GVSK	2	0.34158	3	1.28	1.179	0.793	0.803	1.605	1.444
I3LK59	64	K	Up	Enolase 1	ENO1	1	0.000251	133.32	GVSK(1)AVEHINK	3	-0.38978	4	1.203	1.203	0.761	0.858	1.57	1.379
I3LK59	80	K	Up	Enolase 1	ENO1	1	6.05e-14	177.44	TIAPALVSK(1)K	3	-0.019375	6	1.407	1.176	0.771	0.731	1.815	1.582
I3LK59	81	K	Up	Enolase 1	ENO1	1	0.00036	128.01	K(1)LNVVEQEK	3	-0.073208	6	1.376	1.263	0.697	0.723	1.965	1.717
I3LK59	89	K	Up	Enolase 1	ENO1	1	0.0016	78.324	LNVVEQEK(1)IDK	3	-0.11341	2	1.013	1.487	0.528	0.886	1.905	1.651
I3LK59	233	K	Up	Enolase 1	ENO1	1	0.00063	110.38	NAIGK(1)AGYTDK	3	-0.44994	3	1.157	1.143	0.876	0.859	1.312	1.308
I3LK59	262	K	Up	Enolase 1	ENO1	1	1.69e-05	125.97	YDLDFK(1)SPDDPSR	2	-0.010536	2	1.165	1.17	0.758	0.92	1.527	1.249
I3LK59	330	K	Up	Enolase 1	ENO1	1	0.0122	81.017	ISK(1)AVAEK	2	-0.65332	1	1.586	1.365	0.632	0.521	2.493	2.575
I3LK59	406	K	Up	Enolase 1	ENO1	1	0.00137	102.07	LAK(1)YNQILR	2	-1.8392	2	1.066	1.425	0.555	0.89	1.907	1.574
I3LK59	420	K	Up	Enolase 1	ENO1	1	0.000121	143.24	IEEELGSK(1)AK	3	-0.1917	4	1.502	1.205	0.699	0.691	2.135	1.717
I3LLD5	268	K	Down	Eukaryotic initiation factor 4A-I	EIF4A1	1	0.0042	102.52	K(1)VDWLTEK	2	-0.08442	1	0.72	0.838	1.253	1.186	0.571	0.695
I3LLY3	564	K	Down	Alpha-actinin-1	ACTN1	1	0.0017	94.584	ATLPDADK(1)ER	2	0.562	1	0.701	0.912	1.198	1.167	0.582	0.768
I3LNE5	130	K	Up	Uncharacterized protein	SNRNP70	1	0.00271	90.827	EFEVYGPIK(1)R	2	-1.2369	1	1.101	1.178	0.808	0.919	1.354	1.261
I3LP78	121	K	Down	60S ribosomal protein L9	RPL9	1	0.00579	82.831	NFLGEK(1)YIR	2	-1.3913	1	0.664	0.931	1.142	1.219	0.578	0.75
I3LP78	174	K	Down	60S ribosomal protein L9	RPL9	1	0.000552	106.58	K(1)FLDGIYVSEK	2	1.0112	1	0.861	0.872	1.229	1.069	0.697	0.802
I3LR32	513	K	Down	T-complex protein 1 subunit epsilon	CCT5	1	0.00018	86.772	QQHVIETLIGK(1)K	3	-0.70412	1	0.776	0.972	0.951	1.246	0.811	0.767
I3LRF8	63	K	Down	Poly(rC) binding protein 3	PCBP3	1	0.000375	115.78	EVGSIIGK(1)K	2	-0.50546	1	0.858	0.78	1.299	1.11	0.656	0.691
I3LRS5	37	K	Up	Aldehyde dehydrogenase 1 family member A1	ALDH1A1	1	9.95e-05	98.942	K(1)FPVFNPATEEK	2	-0.23061	2	1.205	1.305	0.611	0.869	1.957	1.477
I3LRS5	62	K	Up	Aldehyde dehydrogenase 1 family member A1	ALDH1A1	0.99846	0.0126	52.172	LCEVEEGDK(0.002)EDVDK(0.998)AVK	3	-0.7244	1	1.541	1.209	0.571	0.76	2.682	1.563
I3LRS5	255	K	Up	Aldehyde dehydrogenase 1 family member A1	ALDH1A1	1	0.0124	80.688	MIK(1)EAAGK	2	-0.42549	2	1.098	1.181	0.753	0.96	1.45	1.209
I3LRS5	260	K	Up	Aldehyde dehydrogenase 1 family member A1	ALDH1A1	1	0.0106	69.721	EAAGK(1)SNLK	2	-1.8062	2	1.54	1.282	0.695	0.589	2.205	2.138
I3LRS5	362	K	Up	Aldehyde dehydrogenase 1 family member A1	ALDH1A1	1	0.000246	114.86	ILDLIESGK(1)K	2	0.60354	3	1.456	1.128	0.759	0.755	1.908	1.469
I3LRS5	412	K	Up	Aldehyde dehydrogenase 1 family member A1	ALDH1A1	1	0.00122	103.91	FK(1)SLDDVIK	2	0.65384	2	1.308	1.161	0.777	0.813	1.673	1.404
I3LSG1	394	K	Up	General transcription factor IIi	GTF2I	1	0.000166	134.84	K(1)HELLNSTR	3	-0.063258	1	1.255	1.06	0.967	0.804	1.289	1.296
I3LT88	34	K	Down	Sodium/potassium-transporting ATPase subunit alpha	ATP1A1	1	0.021	91.318	DMDELK(1)K	2	1.2462	1	0.939	0.872	1.166	1.062	0.801	0.808
I3LT88	35	K	Down	Sodium/potassium-transporting ATPase subunit alpha	ATP1A1	1	0.000164	113.67	K(1)EVSMDDHK	3	3.2017	2	0.812	0.743	1.248	1.22	0.646	0.599
I3LT88	52	K	Down	Sodium/potassium-transporting ATPase subunit alpha	ATP1A1	1	7.85e-05	128.27	K(1)YGTDLSR	2	1.5458	2	0.845	0.853	1.163	1.153	0.722	0.727
I3LT88	473	K	Down	Sodium/potassium-transporting ATPase subunit alpha	ATP1A1	1	0.0014	79.659	HLLVMK(1)GAPER	3	-0.87079	1	0.649	1.02	0.858	1.362	0.751	0.736
I3LT88	738	K	Down	Sodium/potassium-transporting ATPase subunit alpha	ATP1A1	1	0.00408	103.55	LIFDNLK(1)K	2	2.4592	2	0.953	0.812	1.217	1.074	0.778	0.744
I3LUP6	32	K	Down	Nucleophosmin 1	NPM1	0.999969	5.57e-53	202.43	ADKDYHFK(1)VDNDENEHQLSLR	4	-0.39546	2	0.735	0.713	1.325	1.245	0.551	0.564
I3LUP6	267	K	Down	Nucleophosmin 1	NPM1	1	0.00108	134.13	VEAK(1)FINYVK	2	1.8675	1	0.637	0.626	1.454	1.302	0.435	0.473
K7GK75	5	K	Up	Cofilin-1	CFL1	1	0.00312	93.345	K(1)SSTPEEVK	2	-0.16584	2	1.389	1.256	0.677	0.737	2.039	1.676
K7GK75	13	K	Up	Cofilin-1	CFL1	1	0.000421	133.23	SSTPEEVK(1)K	2	0.96811	4	1.278	1.096	0.916	0.791	1.387	1.363
K7GK75	97	K	Up	Cofilin-1	CFL1	1	0.00157	99.5	SK(1)MIYASSK	2	-0.37715	1	1.525	1.322	0.582	0.647	2.602	2.01
K7GKC0	26	K	Down	40S ribosomal protein S16	RPS16	1	0.00404	69.03	LLEPVLLLGK(1)ER	2	-1.7497	1	0.86	0.8	1.261	1.118	0.677	0.704
K7GKC0	71	K	Down	40S ribosomal protein S16	RPS16	1	0.0282	70.552	YVDEASK(1)K	2	-0.69056	1	0.701	0.872	0.979	1.38	0.712	0.622
K7GKJ8	11	K	Up	Phosphoglycerate kinase	PGK1	1	0.00208	94.767	LTLDK(1)LDVK	2	-0.0067029	3	1.49	1.173	0.711	0.722	2.081	1.598
K7GKJ8	166	K	Up	Phosphoglycerate kinase	PGK1	1	0.0015	61.11	AHSSMVGVNLPK(1)K	3	1.0848	1	1.155	1.348	0.692	0.797	1.658	1.662
K7GKJ8	174	K	Up	Phosphoglycerate kinase	PGK1	1	0.0043	101.64	AGGFLMK(1)K	2	-0.89032	1	1.356	1.213	0.71	0.777	1.898	1.534
K7GKJ8	175	K	Up	Phosphoglycerate kinase	PGK1	1	0.00366	107.21	K(1)ELNYFAK	2	1.2733	2	1.314	1.269	0.806	0.676	1.621	1.847
K7GKJ8	250	K	Up	Phosphoglycerate kinase	PGK1	1	0.00274	105.98	IVK(1)DLMSK	2	0.13444	2	1.293	1.219	0.754	0.782	1.705	1.534
K7GKR9	63	K	Down	RNA-binding motif protein, X chromosome	RBMX	1	3.6e-17	147.09	GFAFVTFESPADAK(1)DAAR	3	-0.46639	3	0.604	0.62	1.389	1.384	0.432	0.44
K7GND3	55	K	Down	DExH-box helicase 9	DHX9	1	0.000611	113.67	K(1)DAQSNAAR	2	-0.3119	1	0.969	0.798	1.244	1.057	0.774	0.741
K7GND3	142	K	Down	DExH-box helicase 9	DHX9	1	0.00119	132.56	GANLK(1)DYYSR	2	-1.4172	2	0.661	0.825	1.236	1.254	0.532	0.646
K7GND3	187	K	Down	DExH-box helicase 9	DHX9	1	0.000938	89.08	LNQYFQK(1)EK	3	-0.87536	2	0.621	0.923	1.22	1.195	0.505	0.759
K7GND3	189	K	Down	DExH-box helicase 9	DHX9	1	0.00345	98.048	EK(1)IQGEYK	2	0.026479	2	0.83	0.919	1.074	1.165	0.768	0.776
K7GND3	231	K	Down	DExH-box helicase 9	DHX9	1	0.00159	117.1	EHGSNK(1)K	3	-0.53638	3	0.755	0.655	1.38	1.247	0.543	0.516
K7GND3	232	K	Down	DExH-box helicase 9	DHX9	1	0.000266	81.448	K(1)LAAQSCALSLVR	2	1.2121	1	0.557	0.887	1.124	1.353	0.493	0.645
K7GND3	262	K	Down	DExH-box helicase 9	DHX9	1	0.00092	108.56	K(1)EGETVEPYR	2	-1.155	3	0.856	0.845	1.18	1.14	0.721	0.728
K7GND3	387	K	Down	DExH-box helicase 9	DHX9	1	0.0103	87.323	ELLPVK(1)K	2	0.041135	3	0.958	0.845	1.196	1.054	0.796	0.788
K7GP99	214	K	Down	Interleukin enhancer binding factor 3	ILF3	1	0.000141	120.46	HAK(1)WFQAR	3	0.62946	1	0.798	0.752	1.37	1.125	0.578	0.658
K7GP99	575	K	Down	Interleukin enhancer binding factor 3	ILF3	1	0.000542	120.06	FQGAGSNK(1)K	3	-3.9739	4	0.774	0.869	1.148	1.199	0.67	0.713
K7GP99	602	K	Down	Interleukin enhancer binding factor 3	ILF3	1	6.73e-14	162.48	LFPDTPLALDANK(1)K	3	1.0649	2	0.802	0.824	1.348	1.069	0.59	0.757
K7GQ95	26	K	Up	Protein S100	S100A2	1	0.00067	132.03	YSGQEGDK(1)FK	3	0.93526	4	1.34	1.092	0.892	0.77	1.494	1.394
K7GQ95	31	K	Up	Protein S100	S100A2	1	0.0254	76.1	LSK(1)GEMK	2	-0.65498	1	1.451	1.232	0.743	0.665	1.939	1.822
K7GQ95	35	K	Up	Protein S100	S100A2	1	0.000564	98.048	GEMK(1)ELLHK	3	0.69686	5	1.245	1.119	0.79	0.89	1.565	1.236
K7GQ95	40	K	Up	Protein S100	S100A2	1	4.71e-11	155.57	ELLHK(1)ELPSFVGEK	3	0.86588	2	1.299	1.131	0.877	0.77	1.473	1.443
K7GQ95	56	K	Up	Protein S100	S100A2	1	9.32e-05	126.24	VDEEGLK(1)K	2	1.4186	5	1.383	1.07	0.879	0.771	1.563	1.365
K7GS49	59	K	Down	Interleukin enhancer binding factor 2	ILF2	1	4.66e-14	151.95	VKPAPDETSFSEALLK(1)R	3	0.22878	1	0.629	0.593	1.503	1.303	0.416	0.448
K7GSE0	183	K	Down	LETM1 and EF-hand domain-containing protein 1, mitochondrial	LETM1	1	0.0212	82.563	VK(1)LELAR	2	0.90967	1	0.85	0.77	1.248	1.166	0.676	0.649
K7GSP5	406	K	Down	TSPY like 2	TSPYL2	1	0.0202	44.425	K(1)K(1)QEK(1)EESK	3	-0.78292	1	0.197	1.427	0.25	1.746	0.784	0.804
K7GSP5	407	K	Down	TSPY like 2	TSPYL2	1	0.0202	44.425	K(1)K(1)QEK(1)EESK	3	-0.78292	1	0.197	1.427	0.25	1.746	0.784	0.804
K7GSP5	410	K	Down	TSPY like 2	TSPYL2	1	0.0202	44.425	K(1)K(1)QEK(1)EESK	3	-0.78292	1	0.197	1.427	0.25	1.746	0.784	0.804
K7N7E9	40	K	Down	BUD31 homolog	BUD31	1	0.000209	102.42	EAETEPHEGK(1)R	3	-2.0176	2	0.747	0.707	1.533	1.08	0.484	0.643
K9IVQ3	98	K	Down	Non-POU domain containing octamer binding	NONO	1	0.000222	99.752	YGK(1)AGEVFIHK	3	0.68727	1	0.706	0.629	1.461	1.245	0.48	0.496
K9IVQ3	106	K	Down	Non-POU domain containing octamer binding	NONO	1	0.000321	103.91	AGEVFIHK(1)DK	3	0.77893	2	0.789	0.825	1.173	1.212	0.669	0.669
K9IVQ3	108	K	Down	Non-POU domain containing octamer binding	NONO	1	0.0198	70.929	DK(1)GFGFIR	2	-2.3937	2	0.767	0.804	1.291	1.158	0.589	0.682
K9IVQ3	189	K	Down	Non-POU domain containing octamer binding	NONO	1	2.18e-06	130.72	GRPSGK(1)GIVEFSGK	3	-0.75407	2	0.549	0.673	1.377	1.378	0.395	0.481
K9IVQ3	248	K	Down	Non-POU domain containing octamer binding	NONO	1	3e-06	140.84	NQQFHK(1)ER	3	1.6503	2	0.885	0.716	1.384	1.09	0.636	0.645
K9IVQ3	271	K	Down	Non-POU domain containing octamer binding	NONO	1	0.00208	94.767	WK(1)ALIEMEK	2	0.15883	1	0.695	0.732	1.284	1.285	0.538	0.561
K9IVQ3	294	K	Down	Non-POU domain containing octamer binding	NONO	1	0.00151	126.09	EK(1)LEMEMEAAR	2	0.25799	3	0.586	0.995	1.094	1.246	0.531	0.785
O02705	568	K	Up	Heat shock protein HSP 90-alpha	HSP90AA1	1	0.00874	85.807	TK(1)FENLCK	2	0.44705	1	1.232	1.305	0.709	0.773	1.727	1.661
P00346	296	K	Down	Malate dehydrogenase, mitochondrial	MDH2	1	1.09e-11	99.413	SQETDCPYFSTPLLLGK(1)K	4	0.065151	2	0.851	0.845	1.118	1.191	0.757	0.698
P00346	307	K	Down	Malate dehydrogenase, mitochondrial	MDH2	1	1.96e-07	147.56	NLGIGK(1)ISPFEEK	3	-1.1058	2	0.848	0.693	1.39	1.135	0.606	0.6
P00346	324	K	Down	Malate dehydrogenase, mitochondrial	MDH2	1	1.11e-06	89.231	MIAEAIPELK(1)ASIK	3	-1.2415	3	0.661	1.027	0.975	1.253	0.675	0.807
P00889	43	K	Down	Citrate synthase, mitochondrial	CS	1	4.33e-06	98.943	DILADLIPK(1)EQAR	3	-0.4768	2	0.779	0.907	1.228	1.093	0.631	0.816
P00889	321	K	Down	Citrate synthase, mitochondrial	CS	1	0.000845	136.38	EVGK(1)DVSDEK	2	-0.29463	2	0.916	0.865	1.17	1.084	0.778	0.784
P00889	366	K	Down	Citrate synthase, mitochondrial	CS	1	2.4e-05	80.632	EFALK(1)HLPHDPMFK	4	0.4246	1	0.755	0.949	1.098	1.171	0.683	0.797
P02543	292	K	Down	Vimentin	VIM	1	3.69e-06	146.77	NLQEAEEWYK(1)SK	2	0.37554	2	0.956	0.743	1.237	1.128	0.768	0.647
P02543	373	K	Down	Vimentin	VIM	1	0.00162	57.973	LQDEIQNMK(1)EEMAR	2	1.3293	2	0.755	0.909	1.167	1.157	0.642	0.772
P02543	439	K	Up	Vimentin	VIM	1	2.84e-10	117.2	ETNLESLPLVDTHSK(1)R	3	0.40339	2	0.961	1.427	0.489	1.016	1.955	1.381
P02543	445	K	Up	Vimentin	VIM	1	8.68e-07	155.47	TLLIK(1)TVETR	2	-0.49894	3	1.394	1.068	0.893	0.755	1.552	1.391
P04163	37	K	Down	Protein S100-A10	S100A10	1	1.37e-07	125.47	VLMEK(1)EFPGFLENQK	3	-0.12074	1	0.886	0.908	1.155	1.073	0.763	0.832
P04163	54	K	Down	Protein S100-A10	S100A10	1	0.000978	118.9	DPLAVDK(1)IMK	2	0.21365	1	0.844	0.887	1.158	1.122	0.724	0.778
P04163	57	K	Down	Protein S100-A10	S100A10	1	0.000591	124.67	IMK(1)DLDQCR	2	0.68922	2	0.895	0.88	1.092	1.146	0.814	0.755
P09623	410	K	Down	Dihydrolipoyl dehydrogenase, mitochondrial	DLD	1	0.000676	68.044	SEEQLK(1)EEGIEYK	3	0.65241	1	0.585	1.065	0.845	1.371	0.688	0.763
P09623	417	K	Down	Dihydrolipoyl dehydrogenase, mitochondrial	DLD	0.999999	3.34e-09	118.31	SEEQLKEEGIEYK(1)VGK	3	-0.57412	1	0.746	0.65	1.426	1.223	0.519	0.523
P09623	440	K	Up	Dihydrolipoyl dehydrogenase, mitochondrial	DLD	1	0.000811	66.246	TNADTDGMVK(1)ILGQK	3	-0.4818	1	1.07	1.158	0.87	0.912	1.222	1.25
P19620	81	K	Up	Annexin A2	ANXA2	1	0.00269	110.53	K(1)ELASALK	2	0.88772	2	1.273	1.183	0.816	0.784	1.552	1.482
P19620	115	K	Up	Annexin A2	ANXA2	1	3.84e-08	109.07	TPAQYDASELK(1)ASMK	3	-0.52016	3	1.2	1.1	0.948	0.817	1.257	1.323
P19620	148	K	Up	Annexin A2	ANXA2	1	0.0131	77.732	VYK(1)EMYK	2	0.61302	3	1.05	1.458	0.744	0.72	1.4	1.992
P19620	157	K	Down	Annexin A2	ANXA2	1	3.98e-41	197.75	TDLEK(1)DIISDTSGDFR	3	-1.184	2	0.923	0.77	1.198	1.154	0.766	0.655
P19620	204	K	Up	Annexin A2	ANXA2	1	0.00312	93.325	DLYDAGVK(1)R	2	1.0803	1	1.366	1.101	0.857	0.769	1.584	1.408
P19620	302	K	Up	Annexin A2	ANXA2	1	0.000458	121.6	SEVDMLK(1)IR	2	-0.75841	2	0.975	1.344	0.664	0.952	1.458	1.388
P27485	35	K	Up	Retinol-binding protein 4	RBP4	1	0.0273	72.879	ENFDK(1)AR	2	-0.58616	1	1.406	1.209	0.701	0.753	1.991	1.576
P28491	41	K	Down	Calreticulin	CALR	0.999785	0.000215	126.1	WIESK(1)HKPDFGR	4	0.79114	1	0.839	0.858	1.136	1.173	0.734	0.72
P28491	55	K	Down	Calreticulin	CALR	1	2.48e-08	147.12	FVLSSGK(1)FYGDQEK	2	-0.054488	2	0.844	0.746	1.34	1.124	0.627	0.653
P28491	209	K	Up	Calreticulin	CALR	0.999999	4.16e-05	87.429	IK(1)DPDAVKPEDWDER	3	0.004048	1	1.148	1.225	0.816	0.831	1.398	1.45
P28491	215	K	Up	Calreticulin	CALR	0.999978	0.000601	79.514	IKDPDAVK(1)PEDWDER	3	0.3011	1	1.046	1.295	0.737	0.894	1.41	1.425
P28491	224	K	Down	Calreticulin	CALR	0.985504	0.00492	42.791	AK(0.986)IDDPTDSK(0.014)PEDWDK(0.001)PEHIPDPDAK	5	0.27104	1	0.544	1.091	0.833	1.383	0.648	0.776
P28491	368	K	Down	Calreticulin	CALR	1	3.29e-08	153.97	LK(1)EEEEEK	2	-0.26145	1	0.782	0.639	1.444	1.194	0.538	0.525
P28768	82	K	Up	Superoxide dismutase [Mn], mitochondrial (Fragment)	SOD2	1	0.00341	91.549	GELLEAIK(1)R	2	1.5805	2	1.232	1.105	0.889	0.836	1.378	1.3
P29804	62	K	Down	Pyruvate dehydrogenase E1 component subunit alpha, somatic form, mitochondrial (Fragment)	PDHA1	1	0.0184	72.607	EDGLK(1)YYR	2	0.70671	1	0.817	0.673	1.31	1.241	0.619	0.533
P29804	82	K	Up	Pyruvate dehydrogenase E1 component subunit alpha, somatic form, mitochondrial (Fragment)	PDHA1	1	0.00332	99.013	ADQLYK(1)QK	2	0.19993	2	0.994	1.213	0.773	0.987	1.278	1.209
P29804	243	K	Up	Pyruvate dehydrogenase E1 component subunit alpha, somatic form, mitochondrial (Fragment)	PDHA1	1	8.35e-17	132.25	AAASTDYYK(1)R	2	-0.56915	2	1.08	1.183	0.833	0.909	1.288	1.279
P49666	97	K	Down	60S ribosomal protein L21	RPL21	1	0.00108	98.048	IEHIK(1)HSK	4	0.37264	1	0.959	0.698	1.331	1.097	0.716	0.626
P61288	102	K	Up	Translationally-controlled tumor protein	TPT1	1	0.00896	90.05	GK(1)LEEQRPER	3	0.27643	2	1.471	1.032	0.876	0.75	1.668	1.354
P62802	9	K	Down	Histone H4	---	1	0.00907	91.626	GGK(1)GLGK	2	1.5232	3	0.508	0.418	1.745	1.378	0.289	0.298
P62802	13	K	Down	Histone H4	---	1	7.57e-06	105.14	GLGK(1)GGAK	3	1.2735	5	0.76	0.564	1.564	1.192	0.482	0.464
P62802	32	K	Down	Histone H4	---	1	7.64e-20	180.84	DNIQGITK(1)PAIR	3	1.0749	5	0.771	0.87	1.13	1.214	0.678	0.705
P62802	78	K	Down	Histone H4	---	1	1.38e-93	257.09	DAVTYTEHAK(1)R	2	2.4378	13	0.484	0.424	1.724	1.405	0.279	0.297
P62802	80	K	Down	Histone H4	---	1	3.67e-21	183.41	RK(1)TVTAMDVVYALK	3	0.062753	12	0.448	0.395	1.735	1.451	0.256	0.268
P62802	92	K	Down	Histone H4	---	1	5.25e-138	281.26	TVTAMDVVYALK(1)R	3	1.2743	13	0.458	0.44	1.651	1.465	0.275	0.295
P62831	13	K	Down	60S ribosomal protein L23	RPL23	1	0.00972	76.282	GGSSGAK(1)FR	2	-0.36272	1	0.895	0.732	1.286	1.144	0.691	0.629
P62936	44	K	Up	Peptidyl-prolyl cis-trans isomerase A	PPIA	1	2.91e-05	134.61	ALSTGEK(1)GFGYK	2	-0.77819	5	1.315	1.226	0.728	0.779	1.792	1.546
P62936	49	K	Up	Peptidyl-prolyl cis-trans isomerase A	PPIA	1	0.00147	79.201	GFGYK(1)GSCFHR	3	-0.32016	1	0.98	1.357	0.69	0.914	1.411	1.46
P62936	131	K	Up	Peptidyl-prolyl cis-trans isomerase A	PPIA	1	0.000425	113.7	HVVFGK(1)VK	3	-0.34805	4	1.194	1.089	0.89	0.878	1.332	1.22
P67985	10	K	Up	60S ribosomal protein L22	RPL22	1	0.0135	97.068	LVAK(1)GGK	2	0.088843	1	1.307	1.07	0.848	0.85	1.531	1.239
P67985	107	K	Up	60S ribosomal protein L22	RPL22	1	0.00475	67.019	VVANSK(1)ESYELR	2	-0.11703	1	0.92	1.576	0.635	0.778	1.439	1.991
P82460	3	K	Up	Thioredoxin	TXN	1	0.00245	121.05	VK(1)QIESK	2	-0.96712	3	1.679	1.387	0.485	0.547	3.437	2.493
P82460	39	K	Up	Thioredoxin	TXN	1	7.04e-07	80.312	MIK(1)PFFHSLSEK	3	-3.7304	3	1.427	1.218	0.648	0.771	2.187	1.553
P82460	94	K	Up	Thioredoxin	TXN	1	6.81e-10	163.51	VGEFSGANK(1)EK	2	1.6609	4	1.724	1.353	0.519	0.524	3.304	2.539
Q06A94	8	K	Down	Heterogeneous nuclear ribonucleoprotein A1	HNRNPA1	1	1.08e-31	201.66	SESPK(1)EPEQLR	2	-0.39068	4	0.895	0.76	1.264	1.131	0.703	0.662
Q0Z8U2	10	K	Down	40S ribosomal protein S3	RPS3	1	0.00117	108.7	K(1)FVADGIFK	2	0.51988	1	0.918	0.783	1.211	1.134	0.754	0.679
Q1G1K9	135	K	Down	Isocitrate dehydrogenase [NAD] subunit, mitochondrial	IDH3B	1	4.18e-05	94.688	K(1)LDLFANVVHVK	3	-0.42741	1	0.802	0.818	1.095	1.272	0.726	0.632
Q29092	97	K	Down	Endoplasmin	HSP90B1	1	0.0119	106.94	NK(1)EIFLR	2	-0.82395	1	0.936	0.839	1.225	1.052	0.759	0.784
Q29092	168	K	Up	Endoplasmin	HSP90B1	1	7.87e-11	131.61	NLGTIAK(1)SGTSEFLNK	3	0.13216	1	1.206	1.252	0.654	0.889	1.831	1.386
Q29092	404	K	Up	Endoplasmin	HSP90B1	1	0.00122	104.82	GLFDEYGSK(1)K	2	1.2484	2	1.107	1.312	0.642	0.909	1.712	1.42
Q29092	547	K	Up	Endoplasmin	HSP90B1	1	0.000544	128.21	K(1)EAESSPFVER	2	-0.05349	3	1.124	1.15	0.854	0.893	1.308	1.266
Q29092	633	K	Up	Endoplasmin	HSP90B1	1	4.54e-05	144.17	IEK(1)AVVSQR	2	0.30181	3	1.167	1.114	0.85	0.904	1.364	1.212
Q29205	85	K	Down	60S ribosomal protein L11	RPL11	1	0.00135	99.5	AEEILEK(1)GLK	2	-0.41158	2	0.794	0.821	1.106	1.265	0.714	0.638
Q29221	278	K	Down	F-actin-capping protein subunit alpha-2	CAPZA2	1	0.00568	91.087	ILSYK(1)IGK	2	-0.77406	1	0.823	0.83	1.129	1.219	0.724	0.669
Q29371	6	K	Up	Triosephosphate isomerase	TPI1	1	0.000598	120.99	K(1)FFVGGNWK	2	1.116	1	1.205	1.057	0.94	0.864	1.274	1.203
Q2EN75	31	K	Up	Protein S100-A6	S100A6	1	0.000548	123.67	NTLSK(1)SELK	2	0.66626	4	1.272	1.25	0.74	0.776	1.708	1.583
Q2EN75	35	K	Up	Protein S100-A6	S100A6	1	0.000314	118.28	SELK(1)ELIQK	2	1.2646	2	1.606	1.307	0.618	0.577	2.582	2.229
Q2EN76	26	K	Up	Nucleoside diphosphate kinase B	NME2	1	0.0117	78.098	GLVGEIIK(1)R	2	0.53775	2	0.978	1.35	0.642	0.961	1.516	1.382
Q2EN81	167	K	Down	ATP synthase subunit O, mitochondrial	ATP5O	1	0.000675	115.33	SFLSK(1)GQILK	2	-0.53868	1	0.807	0.736	1.262	1.221	0.635	0.593
Q2VTP6	53	K	Up	Peptidyl-prolyl cis-trans isomerase FKBP1A	FKBP1A	1	0.00113	102.05	FVLGK(1)QEVIR	2	-0.47795	2	1.078	1.198	0.791	0.927	1.353	1.271
Q2XVP5	83	K	Up	Microtubule-associated protein RP/EB family member 1	MAPRE1	1	0.00658	93.992	ILQAGFK(1)R	2	-1.1681	1	0.994	1.479	0.611	0.843	1.614	1.725
Q3YLA6	38	K	Down	Serine/arginine-rich splicing factor 1	SRSF1	1	0.0027	75.911	TKDIEDVFYK(1)YGAIR	3	1.0111	1	0.789	0.885	1.238	1.099	0.634	0.792
Q3ZD69	32	K	Down	Prelamin-A/C	LMNA	1	2.93e-12	161.82	LQEK(1)EDLQELNDR	2	-0.087066	3	0.704	0.873	1.216	1.191	0.575	0.721
Q3ZD69	78	K	Down	Prelamin-A/C	LMNA	1	6.03e-11	114.96	EVSGIK(1)SAYEAELGDAR	3	0.2735	3	0.855	0.865	1.21	1.095	0.702	0.777
Q3ZD69	97	K	Down	Prelamin-A/C	LMNA	1	0.000119	141.88	TLDSVAK(1)ER	2	-0.10079	2	0.892	0.843	1.301	1.02	0.681	0.812
Q3ZD69	114	K	Down	Prelamin-A/C	LMNA	1	0.00225	132.25	VREEFK(1)ELK	3	1.3204	6	0.895	0.907	1.126	1.092	0.79	0.817
Q3ZD69	135	K	Down	Prelamin-A/C	LMNA	1	5.51e-05	143.94	LK(1)DLEALLNSK	2	2.5504	2	0.638	0.638	1.426	1.312	0.445	0.478
Q3ZD69	171	K	Down	Prelamin-A/C	LMNA	1	4.65e-14	168.41	GQVAK(1)LEAALGEAK	2	0.95039	4	0.973	0.733	1.288	1.084	0.75	0.665
Q3ZD69	180	K	Down	Prelamin-A/C	LMNA	1	4.04e-07	153.97	LEAALGEAK(1)K	3	1.1951	8	0.983	0.798	1.259	1.034	0.777	0.758
Q3ZD69	201	K	Down	Prelamin-A/C	LMNA	1	4.03e-09	160.48	LQTLK(1)EELDFQK	3	-0.35925	3	0.783	0.633	1.407	1.23	0.552	0.506
Q3ZD69	260	K	Down	Prelamin-A/C	LMNA	1	2.69e-15	171.62	AQHEDQVEQYK(1)K	3	0.49298	8	0.961	0.777	1.268	1.065	0.754	0.717
Q3ZD69	420	K	Down	Prelamin-A/C	LMNA	1	0.00579	95.775	K(1)LESSESR	2	1.3829	1	0.709	0.678	1.326	1.298	0.531	0.514
Q52NJ6	170	K	Down	Ras-related protein Rab-14	RAB14	1	7.1e-06	85.493	TGENVEDAFLEAAK(1)K	3	-1.3192	1	0.675	0.893	1.161	1.235	0.578	0.711
Q6IM70	181	K	Down	Reticulon	RTN4	1	0.00406	96.143	NVK(1)DAMAK	2	-0.19387	1	0.74	0.799	1.135	1.305	0.647	0.602
Q6S4N2	77	K	Up	Heat shock 70 kDa protein 1B	HSPA1B	1	0.000829	85.837	K(1)FGDPVVQADMK	2	-0.041934	2	1.091	1.231	0.678	0.973	1.6	1.244
Q6SA96	76	K	Up	40S ribosomal protein S23	RPS23	1	0.0345	113.26	VQLIK(1)NGK	2	2.601	1	1.45	1.307	0.686	0.636	2.101	2.02
Q6UAQ8	11	K	Down	Electron transfer flavoprotein subunit beta	ETFB	1	0.0306	81.381	ALVAVK(1)R	2	-0.14169	1	0.783	0.804	1.202	1.215	0.646	0.651
Q6UAQ8	110	K	Up	Electron transfer flavoprotein subunit beta	ETFB	1	0.00292	103.83	VLAK(1)LAQK	2	-0.85766	1	1.298	1.057	0.964	0.778	1.34	1.336
Q9MZ15	72	K	Up	Voltage-dependent anion-selective channel protein 2	VDAC2	1	0.000666	110.08	VTGTLETK(1)YK	2	-3.9331	1	1.281	1.342	0.629	0.764	2.022	1.726
Q9MZ15	277	K	Up	Voltage-dependent anion-selective channel protein 2	VDAC2	1	3.59e-15	133.86	LTLSALVDGK(1)SINAGGHK	3	0.15378	1	1.347	1.073	0.867	0.804	1.542	1.312
Q9MZ16	266	K	Up	Voltage-dependent anion-selective channel protein 1	VDAC1	1	2.27e-14	119.46	LTLSALLDGK(1)NVNAGGHK	4	-0.88621	3	1.057	1.312	0.67	0.92	1.567	1.401
Q9TSX9	106	K	Up	Peroxiredoxin-6	PRDX6	1	1.05e-09	158.11	ETLPFPIIDDK(1)SR	2	0.20182	2	1.454	1.183	0.751	0.707	1.923	1.645
Q9TSX9	141	K	Up	Peroxiredoxin-6	PRDX6	1	0.00207	97.734	VVFIFGPDK(1)K	2	0.60196	1	1.459	1.065	0.839	0.753	1.727	1.391
